# Supplementary material for: Modeling ERBB receptor-regulated G1/S transition to find novel targets for de novo trastuzumab resistance
Source: PubMed Central journal article supplement (PMC2652436; doi:10.1186/1752-0509-3-1), 2009-01-01
Supplement: 1752-0509-3-1-S1.pdf [file 1752-0509-3-1-S1.pdf]

## ADDITIONAL FILE 1

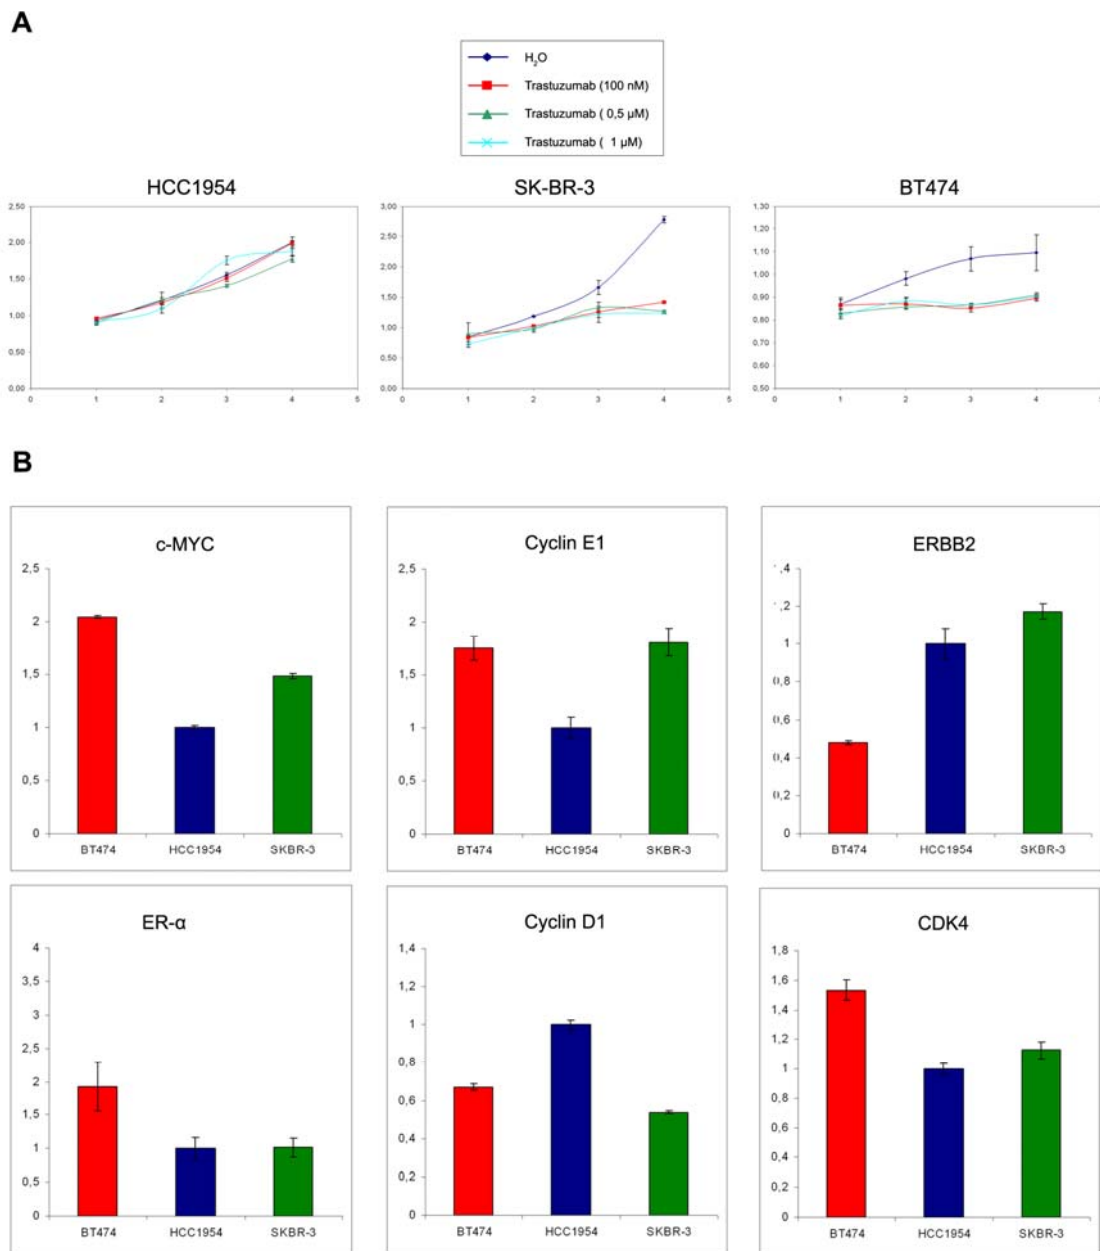

**Figure 1.** Test of different concentrations of trastuzumab and Reverse Phase Protein Array quantification of network proteins in resistant and sensitive cells. **A.** WST-1 viability assay to determine the response of cells to different trastuzumab concentrations (100 nM, 0.5 μM and 1 μM) over 4 days. Water was used as vehicle control. **B.** Reverse Phase Protein Array results for the quantification of ERBB2

receptor and candidate proteins to be targeted in resistant HCC1954 and sensitive SK-BR-3 and BT474 cells.

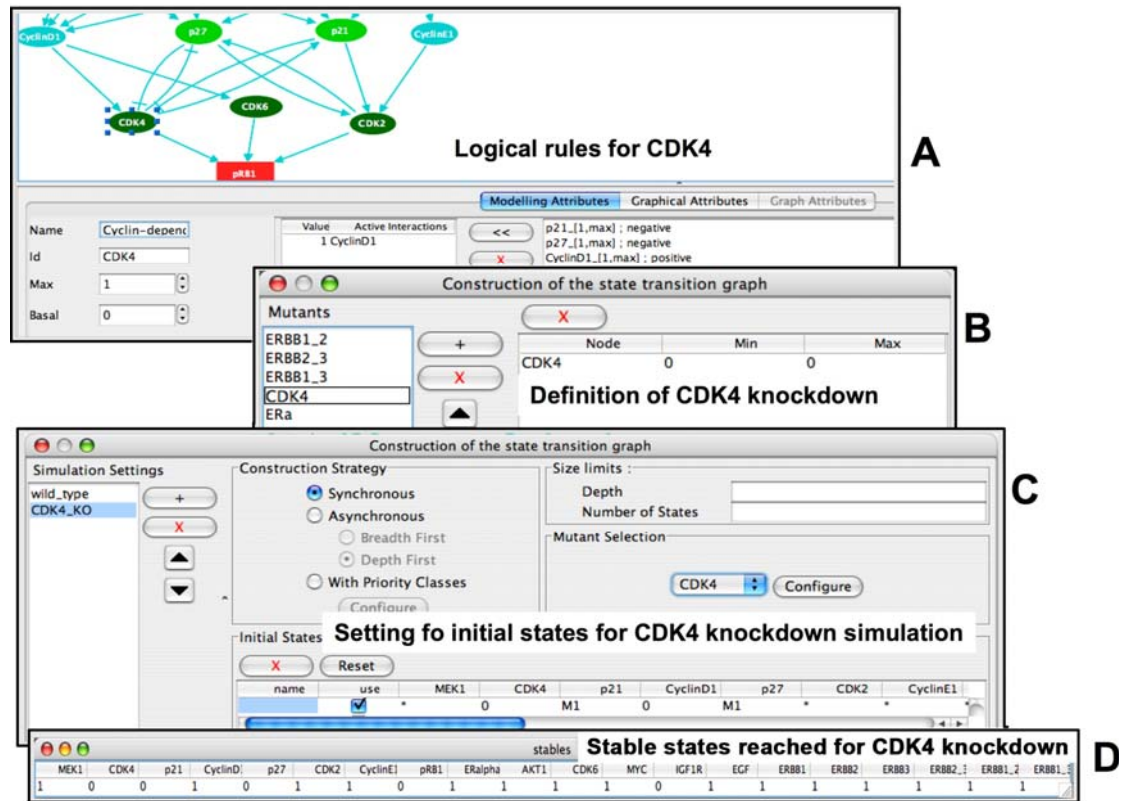

**Figure 2.** Logical knockdown simulations. **A.** CDK4 knockdown was taken as an example to describe the logical definition of knockdown situations. Logical rule for the activation of CDK4 protein was shown as an example. It shows that CDK4 is activated when Cyclin D1 is active, but neither p21 nor p27. **B.** Minimum and maximum values of CDK4 were set to “0” to implement a knockdown of this factor. **C.** For each knockdown, we determined a set of relevant initial states, with the knockdown proteins set to "0". “0” means inactive, “M1” means active and “\*” means that the corresponding protein can take any of these values. **D.** Stable states reached for CDK4 knockdown, with pRB = 0.

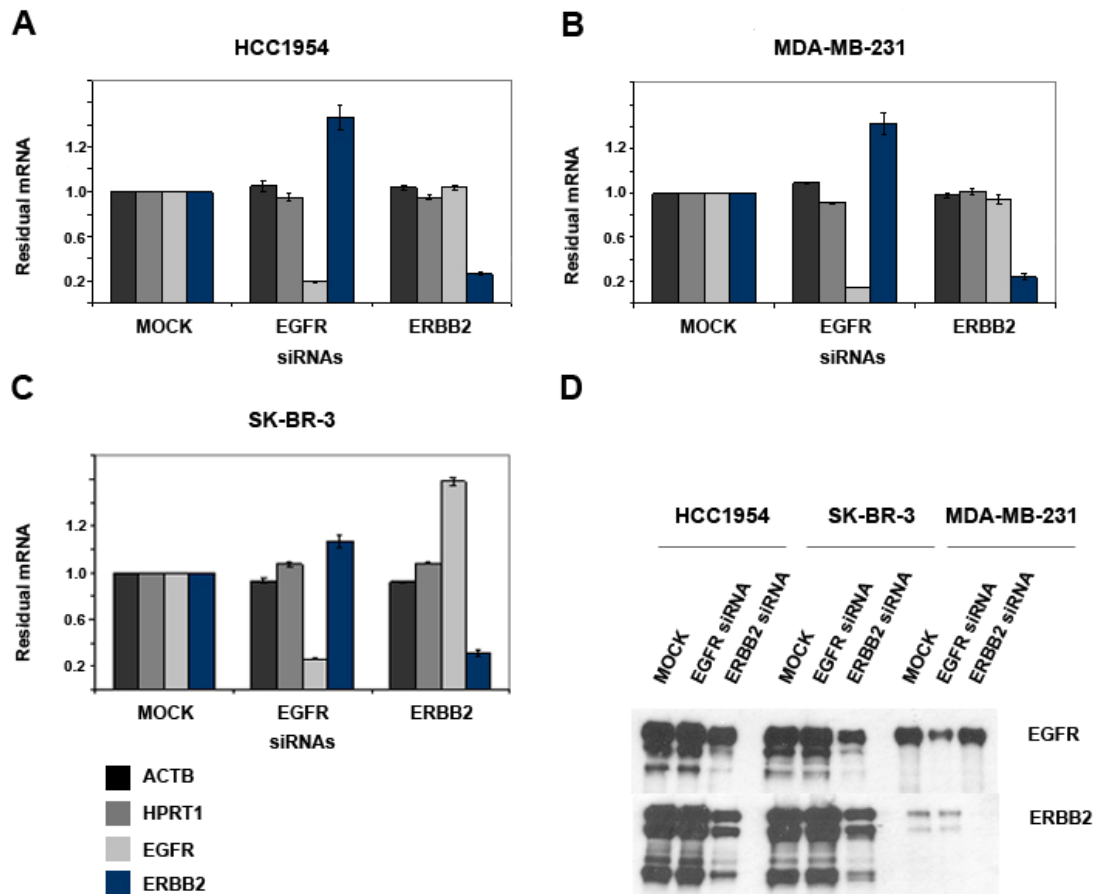

**Figure 3.** Stabilization of EGFR protein by ERBB2 in ERBB2 overexpressing HCC1954 and SK-BR-3 cells, but not in low ERBB2 expressing MDA-MB-231 cells. **A, B** and **C.** qRT-PCR results showing the knockdown efficiencies of EGFR and ERBB2 siRNA pools (20 nM) at mRNA level in HCC1954, MDA-MB-231 and SK\_BR\_3 cells, respectively. ACTB and HPRT1 genes were used as house-keeping controls. **D.** Western blots demonstrating the knockdown efficiencies of EGFR and ERBB2 siRNAs at protein level in ERBB2 overexpressing HCC1954 and SK-BR-3 cells, and in low ERBB2 expressing MDA-MB-231 cells. In ERBB2 siRNA transfected cells both EGFR and ERBB2 were down regulated in HCC1954 and SK-BR-3 cells, but not in MDA-MB-231 cells although siRNAs have no targeting activity against each other at mRNA level (A, B and C).

**Table 1** The list of references for each interaction shown in Figure 3

|    |                                                                                                                                                                                |                                                                                              |
|----|--------------------------------------------------------------------------------------------------------------------------------------------------------------------------------|----------------------------------------------------------------------------------------------|
| 1  | EGF binds to ERBB1 homodimer and this results in its activation                                                                                                                | Holbro T, et al, 2003 (Experimental Cell Research)                                           |
| 2  | EGF stimulates ERBB1/ERBB2 heterodimer and results in phosphorylation of Ty1248 residue of ErbB2                                                                               | Holbro T, et al, 2003 (Experimental Cell Research) / Johannessen LE et al, 2001 (Biochem. J) |
| 3  | EGF binds to the EGFR and promotes the formation of EGFR/EGFR homodimers and EGFR/ERBB2 heterodimers and, less frequently, EGFR/ERBB3                                          | Anido J et al, 2003 (Clinical Cancer Research) / Alroy I and Yarden Y, 1997 (FEBS Lett.)     |
| 4  | EGF stimulates the formation of ERBB2/ERBB3 hetero-oligomers in cells that also express the EGFR                                                                               | Huang GC and Ouyang RJ, 1998 (Biochem. J) / Gamett DC et al, 1997 (J. Biol. Chem.)           |
| 5  | ERBB2/ERBB3 protein decreases expression of IGF1R mRNA                                                                                                                         | Alaoui-Jamali MA et al, 2003 (Cancer Research)                                               |
| 6  | The docking protein Gab1 is the primary mediator of EGF-stimulated activation of the PI-3K/Akt cell survival pathway (EGFR do not include canonical PI-3 kinase binding sites) | Mattoon DR, et al, 2004 (BMC Biol.)                                                          |
| 7  | Following EGFR phosphorylation, Ras-GTP activates Raf-1 that phosphorylates MAPK                                                                                               | Hallberg B et al, 1994 (J Biol Chem) / Liebmann C, 2001 (Cell signal)                        |
| 8  | ERBB1/ERBB2 heterodimers are potent in activating the phosphoinositide 3-kinase (PI3K)                                                                                         | Zhan L et al, 2006 (Cancer Research)                                                         |
| 9  | ERBB1/ERBB2 heterodimers are potent in activating the Ras/mitogen-activated protein kinase pathway                                                                             | Zhan L et al, 2006 (Cancer Research)                                                         |
| 10 | The principal mechanism that drives EGFR-dependent PI3K activation is the dimerization of the receptor with ERBB3                                                              | Scaltriti M and Baselga J, 2006 (Clinical Cancer Research)                                   |
| 11 | ERBB1/ERBB2 heterodimers can activate MAPK pathway by docking Grb2/Ras proteins                                                                                                | Alroy I and Yarden Y, 1997 (FEBS Lett)                                                       |
| 12 | ERBB3 couple active ERBB2 to the phosphatidylinositol 3-kinase/protein kinase B pathway                                                                                        | Holbro T et al, 2003 (PNAS)                                                                  |
| 13 | High levels ERBB2/ERBB3 signalling lead to persistent Ras activity via amplification of MAPK pathway                                                                           | Butt AJ et al, 2005 (Endocrine-Related Cancer)                                               |
| 14 | IGF1R activates docking protein IRS-1 which is responsible for coupling to PI3K pathway                                                                                        | Shelton JG et al, 2004 (Cell Cycle)                                                          |
| 15 | IGF1R activates docking substrate Shc which activates SOS, Ras and downstream Raf/MEK/ERK cascade                                                                              | Shelton JG et al, 2004 (Cell Cycle)                                                          |
| 16 | AKT1 protein increases expression of human IGF1R protein.                                                                                                                      | Tanno S et al, 2001 (Cancer Research)                                                        |
| 17 | ER alpha protein increases expression/phosphorylation of IGF1R protein.                                                                                                        | Levin ER, 2003 (Mol Endocrinology) / Oesterreich S et al, 2001 (Cancer Research)             |
| 18 | Activation of PI3K/AKT results in ligand-independent activation of ER alpha                                                                                                    | Martin MB et al, 2000 (Endocrinology)                                                        |
| 19 | Inhibition of PI3K by LY294002 decreases the half-life of the 4.5 kb Cyclin D1 mRNA / AKT stabilizes Cyclin D                                                                  | Dufourny B et al, 2000 (J. Endocrinology)                                                    |
| 20 | AKT phosphorylates p27 on residues within its nuclear localization motifs leading to relocalization to cytoplasm (no inhibition of Cyclin E/CDK2 complex)                      | Liang J and Slingerland JM, 2003 (Cell Cycle)                                                |
| 21 | AKT phosphorylates p21 on residues within its nuclear localization motifs leading to relocalization to cytoplasm (no inhibition of Cyclin E/CDK2 complex)                      | Liang J and Slingerland JM, 2003 (Cell Cycle)                                                |
| 22 | PI3K/AKT pathway stimulates translation of C-MYC mRNA and stabilization of the protein                                                                                         | Sears R et al, 2000 (Genes Dev.)                                                             |
| 23 | (MAPK) activated by growth factors phosphorylates at Ser 118 and potentiates the N-terminal transactivation function (AF-1)                                                    | Kato S et al, 1995 (Science)                                                                 |
| 24 | Sustained ERK activity increases Cyclin D1 mRNA and protein level / Raf/MEK/ERK cascade increases transcription of cyclin D1                                                   | Weber JD et al, 1997 (Biochem J)/Coleman et al, 2004                                         |
| 25 | Ras/Raf/MEK/MAPK pathway regulates C-MYC expression                                                                                                                            | Cheng M et al, 1999 (J Biol Chem)/Sears R et al, 2000 (Genes Dev.)                           |
| 26 | ER activation at the Cyclin D1 promoter is mediated by both the cyclic AMP-response element and the activating protein-1 site                                                  | Liu MM et al, 2002 (J Biol Chem)                                                             |
| 27 | Adenoviral expression of ER alpha in ER-negative breast cancer cells leads to increase in protein levels p27 cyclin-dependent kinase inhibitor                                 | Licznar A et al, 2003 (FEBS Lett)                                                            |
| 28 | ER alpha induced the expression of several endogenous genes such as the cyclin kinase inhibitor p21                                                                            | Lazennec et al, 2001 (Endocrinology) / Zhao H et al 2004 (J. Cell Biochem.)                  |
| 29 | Induction of C-MYC through ER alpha leads to activation of Cyclin E/CDK2 complex via reduction of p21                                                                          | Sutherland RL et al, 1998 (J Mammary Gland Biol Neoplasia)                                   |
| 30 | Cyclin D1 expression is regulated by C-MYC at transcriptional level                                                                                                            | Bartek J and Lukas J, 2001 (FEBS Letters)                                                    |
| 31 | MYC acts as an upstream regulator of CDKs and functionally antagonizes the action of p27                                                                                       | Maddika S et al, 2007 (Drug Resistance Updates)                                              |
| 32 | Interaction of MYC-MAX heterodimer with MIZ-1 and/or SP-1 inactivates p21                                                                                                      | Pelengaris et al, 2002 (Nature Reviews Cancer)                                               |
| 33 | Induction of C-MYC leads to activation of Cyclin E/CDK2 complex via reduction of p21                                                                                           | Prall OW et al, 1998 (MCB)                                                                   |
| 34 | Cyclin D1 binds to CDK4 to activate its kinase activity                                                                                                                        | Morgan DO, 1997 (Ann Rev Cell Dev Biol)                                                      |
| 35 | Cyclin D1 binds to CDK6 to activate its kinase activity                                                                                                                        | Vermeulen K et al, 2003 (Cell Prolif)                                                        |
| 36 | p27 inhibits the activity of CDK4                                                                                                                                              | Cariou S et al, 2000 (PNAS)                                                                  |
| 37 | The growth factor activation of Cyclin D/CDK4 complex sequesters unbound p27 and inhibits its inhibitory effect of Cyclin E/CDK2 complex                                       | Grillo M et al, 2006 (Breast Cancer Research and Treatment)                                  |
| 38 | The cyclin E-CDK2 complex positively regulates its activity by phosphorylating p27, which is then targeted for degradation                                                     | Sherr CJ and Roberts JM, 2004 (Gene Dev)/ Müller D et al, 1997 (Oncogene)                    |
| 39 | p27 prevents the activation of CDK2                                                                                                                                            | Cariou S et al, 2000 (PNAS)                                                                  |
| 40 | The growth factor activation of Cyclin D/CDK4 complex sequesters unbound p21 and inhibits its inhibitory effect of Cyclin E/CDK2 complex                                       | Grillo M et al, 2006 (Breast Cancer Research and Treatment)                                  |
| 41 | p21 inhibits the activity of CDK4                                                                                                                                              | Harper JW et al, 1995 (MBC)                                                                  |
| 42 | p21 inhibits the activity of CDK2                                                                                                                                              | Harper JW et al, 1995 (MBC)                                                                  |
| 43 | Cyclin D/CDK4 complex phosphorylates pRB protein at Ser 807/811                                                                                                                | Zarkowska T et al, 1997 (J Biol Chem)                                                        |
| 44 | Activated cyclin D/CDK4 or CDK6 complex phosphorylates pRB, releasing it from its growth-suppressive functions                                                                 | Yu B et al, 2000 (Molecular Cell Biology Research Communications)                            |
| 45 | Cyclin E binds to and activates CDK2 to regulate G1/S transition                                                                                                               | Ohtsubo M et al, 1995 (Mol Cell Biol)                                                        |
| 46 | The activated cyclin E/CDK2 complex also contributes to the phosphorylation of pRB late in G1                                                                                  | Hatakeyama M, 1994 (Genes Dev) / Hinds P et al, 1994 (PNAS)                                  |

**Table 2** The list of siRNAs and sequences

| Gene   | Accession number | No. | Sense Sequence         | Antisense Sequence          |
|--------|------------------|-----|------------------------|-----------------------------|
| MAP2K1 | NM_002755        | 1   | GCACAUGGAUGGAGGUUCUUU  | 5'-P AGAACCCGUCUCUGUCUU     |
| MAP2K1 | NM_002755        | 2   | GCAGAGAGAGCAGAUUUUAUU  | 5'-P UCAAAUCUGCUCUCUCUGCUU  |
| MAP2K1 | NM_002755        | 3   | GAGCAGAUUGAAGCAACUUU   | 5'-P AGUUGGUUCAAUCUGUCUU    |
| MAP2K1 | NM_002755        | 4   | CCAGAAAACUAAUUAUCUUU   | 5'-P AGAUGAAUUAAGCUUUCUGGUU |
| AKT1   | NM_005163        | 1   | GACAAGGACGGGCACAUUAUU  | 5'-P UAAUGUGCCGUCUUCUGCUU   |
| AKT1   | NM_005163        | 2   | GGACAAGACGGGCACAUUUU   | 5'-P AAUGUGCCGUCUUCUGCUU    |
| AKT1   | NM_005163        | 3   | GCUACUUCUCCUCAAGAAUU   | 5'-P UUCUUGAGGAGGAAGUAGCUU  |
| AKT1   | NM_005163        | 4   | GACCGCCUCUGCUUUGUCAUU  | 5'-P UGACAAAGCAGAGGCGGUCUU  |
| ESR1   | NM_000125        | 1   | GAAUGUGCCUGGCUAGAGAAU  | 5'-P UCUCUAGCCAGGCACAUUCUU  |
| ESR1   | NM_000125        | 2   | CAUGAGAGCUGCCACCUUUU   | 5'-P AAGGUUGGCAGCUCUCAUGUU  |
| ESR1   | NM_000125        | 3   | AGAGAAAGAUUGGCCAGUAUU  | 5'-P UACUGGCCAAUCUUUCUCUUU  |
| ESR1   | NM_000125        | 4   | GAUCAAAAGCUCUAAGAAGUU  | 5'-P CUUCUUAGAGCGUUUGAUCUU  |
| CDKN1B | NM_004064        | 1   | GGAGCAAUGCGCAGGAUAUU   | 5'-P UAUUCCUGCGAUUGCUCUU    |
| CDKN1B | NM_004064        | 2   | GAGCAAUGCGCAGGAUAUUU   | 5'-P UUUUCCUGCGCSUUGCUCUU   |
| CDKN1B | NM_004064        | 3   | GCAUGCGCAGGAUAAGGUU    | 5'-P CCUUUUUCCGUCGCAUUGCUU  |
| CDKN1B | NM_004064        | 4   | CGACGAUUCUUCUACUCAAUU  | 5'-P UUGAGUAGAGAAUDGUDGUU   |
| CDKN1A | NM_000389        | 1   | GAUGGAACUUGGACUUUGUUU  | 5'-P ACAAGUCGAGAUUCCAUCUU   |
| CDKN1A | NM_000389        | 2   | GCGAUGGAACUUGGACUUUUU  | 5'-P AAAGUCGAGAUUCCAUCGCUU  |
| CDKN1A | NM_000389        | 3   | CGAUGGAACGGCGACUUUGUU  | 5'-P CAAAGUCGAGAUUCCAUCGCUU |
| CDKN1A | NM_000389        | 4   | CGACUGAUGGCGCUAAGUUU   | 5'-P CAUUAGCGCAACACAGUCUU   |
| CDK4   | NM_000075        | 1   | GCAGCACUUAUCUACAUUU    | 5'-P AUGUAGAUAGAGUGCUGCUU   |
| CDK4   | NM_000075        | 2   | GGAGGAGGCCUUCUCCAUCAUU | 5'-P UGAUGGGAAGGCCUUCUCUUU  |
| CDK4   | NM_000075        | 3   | UCGAAAGCCUCUCUUCUGUUU  | 5'-P ACAGAAGAGAGGCUUUCGAUU  |
| CDK4   | NM_000075        | 4   | GUACCGAGCUCUCCGAAGUUU  | 5'-P AACUUCGGGAGCUCGGUACUU  |
| CDK2   | NM_001798        | 1   | GAGCUAACCAUCCUAUAUUU   | 5'-P UAUUAGGAGGUUUAAGUCUUU  |
| CDK2   | NM_001798        | 2   | GAGAGGUGGUGCGCUUAUUU   | 5'-P UUAAGCGCCACCACCUCUCUU  |
| CDK2   | NM_001798        | 3   | GCACCAAGAUUCCAGAAUUU   | 5'-P UUUUAGGAGUUCUUGGUCUUU  |
| CDK2   | NM_001798        | 4   | GGACGGAGCUUGUUAUCGCUU  | 5'-P GCGAUAACAGCUCCGUCCUU   |
| CCNE1  | NM_001238        | 1   | GGAAUCUUAUCCUCAAAGUU   | 5'-P CUUUGGAGGUAAGAUUCCUUU  |
| CCNE1  | NM_001238        | 2   | GGAGGUGUGAAGUCUAUUU    | 5'-P AUAGAUUACACACCUCUCUUU  |
| CCNE1  | NM_001238        | 3   | CUAAAUGACUUAACAUGAAGUU | 5'-P CUUCAUGUAAGUCAUUUCGUU  |
| CCNE1  | NM_001238        | 4   | GUAAUUGGCACACAAGAAUU   | 5'-P UUCUUGUGUCGCAUAUACUU   |
| CCND1  | NM_053056        | 1   | GUUCGUGGCCUCUAAAGAUGUU | 5'-P CAUCUUAGAGGCCACGAACUU  |
| CCND1  | NM_053056        | 2   | CCGAGAAGCUGCGGACUUAUU  | 5'-P UUAAGGAGGUAUUGGUCUUU   |
| CCND1  | NM_053056        | 3   | GAACAGAAGUGCGAGGAGGUU  | 5'-P CCUCCUCGCACUUCUGUUCUU  |
| CCND1  | NM_053056        | 4   | ACAACUUCUUGUCCUACUUAUU | 5'-P UAGUAGGACAGGAAGUUGUUU  |
| IGF1R  | NM_000875        | 1   | GGCCAGAAUUGGAGAAUAUU   | 5'-P UUAUUCUCCAUUUCUGGCCUU  |
| IGF1R  | NM_000875        | 2   | GCAGACACCUACAACAUCUUU  | 5'-P UGAUGUUGUAGGUGUCUGCUU  |
| IGF1R  | NM_000875        | 3   | GGACUCAGUUCGUAUAUUU    | 5'-P UAAACGGGUAUUGGUCUUU    |
| IGF1R  | NM_000875        | 4   | GUGGGAGGUUGGUGAUUAUU   | 5'-P UAAUCACCAACCCUCCACUU   |
| MYC    | NM_002467        | 1   | ACGGAACUCUUGUGCGUAUUU  | 5'-P UUAACGCACAAGAGUUCGGUUU |
| MYC    | NM_002467        | 2   | GAACAGACAACGUGUUGGAUU  | 5'-P UCCAAGAGUUUGUGUUCUUU   |
| MYC    | NM_002467        | 3   | AACGUUAGCUUACCAACAUUU  | 5'-P UGUUGGUGAAGCUAACGUUUU  |
| MYC    | NM_002467        | 4   | CGAUGUUGUUCUGUGGAUUU   | 5'-P UUCCACAGAAACAACUCCUUU  |
| ERBB3  | NM_001005915     | 1   | GCGAUGCUGAACAACAAUAUU  | 5'-P UAUUGGUUCUCAGCAUCGCUU  |
| ERBB3  | NM_001005915     | 2   | AGAUUGUCUCACGGGACAUUU  | 5'-P UGUCCCGUAGCAACAUCUUU   |
| ERBB3  | NM_001005915     | 3   | GCAGUGGUAUUGGAGAAGUGUU | 5'-P CACUUCUGCAAUCCAGUGCUU  |
| ERBB3  | NM_001005915     | 4   | UCGUCAGUUGAACUAUAUUU   | 5'-P UUAUAGUUAACAAGACGAUU   |
| ERBB2  | NM_004448        | 1   | UGGAAGAGUACACAGGUUAUU  | 5'-P UAACCGUGAUCUCUUCUCCUU  |
| ERBB2  | NM_004448        | 2   | GAGACCCGUGAACAUAUCUUU  | 5'-P GUAUUGUUCAGCGGGUCUCUU  |
| ERBB2  | NM_004448        | 3   | GGAGGAUUGCCGAGUACUGUU  | 5'-P CAGUACUCGGCAUUCUCCUUU  |
| ERBB2  | NM_004448        | 4   | GCUCAUCGCUACAACCAAUUU  | 5'-P UUGGUUGUGAGCGAUGAGCUU  |
| EGFR   | NM_201283        | 1   | CAAAGUGUGUAACGGAUAUUU  | 5'-P UAUUCCGUUACACACUUUGUU  |
| EGFR   | NM_201283        | 2   | CCAUAAAUGCUACGAUAUUU   | 5'-P AUUUUUGAAGCAUUUAUGGUU  |
| EGFR   | NM_201283        | 3   | GUAACAAGCUCACGCAGUUUU  | 5'-P AACUGCGUGAGCUUGUUACUU  |
| EGFR   | NM_201283        | 4   | CAGAGGAUGUUAUAUAUCUUU  | 5'-P AGUUUAUUGAACAUCUUCUGUU |
| CDK6   | NM_001259        | 1   | GCAAAGACCUACUUCUGAAUU  | 5'-P UUCAGAAUAGGUCUUUUGCUU  |
| CDK6   | NM_001259        | 2   | UAACAGAUUACGUAACUUAUU  | 5'-P AGUUCUAGAUUUCUGUUAUU   |
| CDK6   | NM_001259        | 3   | GAUAUGAUUUUCAGCUUCUUU  | 5'-P GAAGCGAAACAUAUAUCUUU   |
| CDK6   | NM_001259        | 4   | GCACUAAUCAGCACACAUUAUU | 5'-P UAUGUGUGCGAUUAGUGCUU   |

**Table 3** The list of antibodies

| Antibody  | Company                      | Catalog no  | Dilution WB | Dilution RPPA | Storage (C) | Species |
|-----------|------------------------------|-------------|-------------|---------------|-------------|---------|
| EGFR      | Santa Cruz                   | sc-03       | 1/500       | 1/500         | 4           | Rabbit  |
| ERBB2     | Neomarkers                   | Ab-17       | 1/500       | 1/500         | 4           | Mouse   |
| ERBB3     | Upstate                      | 05-390      | 1/500       | NA            | -20         | Mouse   |
| ERBB4     | Upstate                      | 06-572      | 1/300       | NA            | -20         | Rabbit  |
| IGF1R     | Upstate                      | 05-656      | 1/500       | NA            | -20         | Mouse   |
| ER alpha  | Upstate                      | 05-820      | 1/250       | NA            | -20         | Rabbit  |
| MYC       | Cell Signalling Technologies | 9402        | 1/500       | NA            | -20         | Rabbit  |
| AKT1      | BD                           | 610860      | 1/1000      | 1/500         | -20         | Mouse   |
| pAKT1     | Covance                      | PRB-542P    | 1/1000      | 1/250         | -20         | Rabbit  |
| MEK1      | BD                           | 610122      | 1/1000      | NA            | -20         | Mouse   |
| ERK1/2    | Santa Cruz                   | sc-94(K-23) | 1/1000      | 1/500         | 4           | Rabbit  |
| pERK1/2   | RD systems                   | AF1018      | 1/1000      | 1/500         | -20         | Rabbit  |
| p21       | BD                           | 610233      | 1/500       | 1/200         | -20         | Mouse   |
| p27       | BD                           | 610241      | 1/1000      | 1/200         | -20         | Mouse   |
| CDK2      | BD                           | 610146      | 1/500       | 1/200         | -20         | Mouse   |
| CDK4      | Cell Signalling Technologies | 2906        | 1/500       | 1/200         | -20         | Mouse   |
| CDK6      | Sigma                        | C8343       | 1/500       | NA            | 4           | Mouse   |
| Cyclin D1 | Cell Signalling Technologies | 2926        | 1/500       | 1/200         | -20         | Mouse   |
| Cyclin E1 | Santa Cruz                   | sc-247      | 1/500       | NA            | 4           | Mouse   |
| pRB       | Cell Signalling Technologies | 9308        | 1/500       | 1/250         | -20         | Rabbit  |

**Table 4** The list of primers, primer sequences and probe numbers

| Gene         | Gene ID     | UPL Probe # | UPL Probe Catalog # | Primer sequence            |
|--------------|-------------|-------------|---------------------|----------------------------|
| EGFR_left    | NM_005228.3 | 50          | 4688112001          | acacagaatctatacccaccagagt  |
| EGFR_right   | NM_005228.3 | 50          | 4688112001          | atcaactcccaaacggtcac       |
| ERBB2_left   | NM_004448.2 | 4           | 4685016001          | gggaaacctggaactcacct       |
| ERBB2_right  | NM_004448.2 | 4           | 4685016001          | ccctgcacctcctggata         |
| ERBB3_left   | NM_001982.2 | 86          | 4689119001          | cacaatgccgacctctcc         |
| ERBB3_right  | NM_001982.2 | 86          | 4689119001          | cacgaggacatagcctgtca       |
| IGF1R_left   | NM_000875.2 | 55          | 4688520001          | aaaaaccttcgcctcatcc        |
| IGF1R_right  | NM_000875.2 | 55          | 4688520001          | tggtgtcgaggacgtagaa        |
| ESR1_left    | NM_000125.2 | 24          | 4686985001          | ttactgaccaacctggcaga       |
| ESR1_right   | NM_000125.2 | 24          | 4686985001          | atcatggagggtcaaatcca       |
| MYC_left     | NM_002467.3 | 75          | 4688988001          | ttttcgggtagtggaaaacc       |
| MYC_right    | NM_002467.3 | 75          | 4688988001          | ttcctgttggtgaagtaacg       |
| AKT1_left    | NM_005163.2 | 45          | 4688058001          | gcagcacgtgtacgagaaga       |
| AKT1_right   | NM_005163.2 | 45          | 4688058001          | ggtgtcagtctccgacgtg        |
| MAP2K1_left  | NM_002755.2 | 7           | 4685059001          | ttttaggaaaagtttagcattgctgt |
| MAP2K1_right | NM_002755.2 | 7           | 4685059001          | agggcttgacatctctgtgc       |
| CDKN1A_left  | NM_078467.1 | 32          | 4687655001          | tcactgtctgtaccctgtgc       |
| CDKN1A_right | NM_078467.1 | 32          | 4687655001          | ggcgttggagtggtagaaa        |
| CDKN1B_left  | NM_004064.2 | 1           | 4684974001          | agatgtcaaacgtgcgagtg       |
| CDKN1B_right | NM_004064.2 | 1           | 4684974001          | cgggtaactctctgtggtc        |
| CCND1_left   | NM_053056.2 | 67          | 4688660001          | gaagatcgtcgccacctg         |
| CCND1_right  | NM_053056.2 | 67          | 4688660001          | gacctcctcctcgacttct        |
| CCNE1_left   | NM_001238.1 | 36          | 4687949001          | ggccaaaatcgacaggac         |
| CCNE1_right  | NM_001238.1 | 36          | 4687949001          | gggtctgcacagactgcat        |
| CDK2_left    | NM_001798.2 | 50          | 4688112001          | cctcctgggctgcaaata         |
| CDK2_right   | NM_001798.2 | 50          | 4688112001          | cagaatctccaggaataggg       |
| CDK4_left    | NM_000075.2 | 25          | 4686993001          | gtgcagtcggtggtacctg        |
| CDK4_right   | NM_000075.2 | 25          | 4686993001          | tgtgtgggttaaaagtcagca      |
| CDK6_left    | NM_001259.5 | 2           | 4684982001          | tgatcaactaggaaaaatctggac   |
| CDK6_right   | NM_001259.5 | 2           | 4684982001          | ggcaacatctctaggccagt       |
