# Supplementary material for: Modeling ERBB receptor-regulated G1/S transition to find novel targets for de novo trastuzumab resistance
Source: PubMed Central journal article supplement (PMC2652436; doi:10.1186/1752-0509-3-1), 2009-01-01
Supplement: 1752-0509-3-1-S2.pdf [file 1752-0509-3-1-S2.pdf]

## ADDITIONAL FILE 2

**Table 1** Stable states and pRB response for single and multiple knockdowns of network proteins. Green rows demonstrate the stable states obtained for knockdown simulations, which are the same as MOCK (unperturbed) case. Grey rows indicate the knockdown simulations, for which there are two stable states. pRB1 in red shows that the corresponding knockdown simulations result in pRB=1 (i.e. there is G1/S transition).

| Knockdowns | Gene                      | Min         | Max         | Stable State(s)                                                                                                                                                           |
|------------|---------------------------|-------------|-------------|---------------------------------------------------------------------------------------------------------------------------------------------------------------------------|
| MOCK       | -                         | -           | -           | <b>1 Stable state</b><br>MEK1 ; CDK4 ; CyclinD1 ; CDK2 ; CyclinE1 ; <b>pRB1</b> ; ERalpha ; AKT1 ; CDK6 ; MYC ; EGF ; ERBB1 ; ERBB2 ; ERBB3 ; ERBB2_3 ; ERBB1_2 ; ERBB1_3 |
| AKT1       | AKT1                      | 0           | 0           | <b>1 Stable state</b><br>MEK1 ; CDK4 ; CyclinD1 ; CDK2 ; CyclinE1 ; <b>pRB1</b> ; ERalpha ; CDK6 ; MYC ; EGF ; ERBB1 ; ERBB2 ; ERBB3 ; ERBB2_3 ; ERBB1_2 ; ERBB1_3        |
| MEK1       | MEK1                      | 0           | 0           | <b>1 Stable state</b><br>CDK4 ; CyclinD1 ; CDK2 ; CyclinE1 ; <b>pRB1</b> ; ERalpha ; AKT1 ; CDK6 ; MYC ; EGF ; ERBB1 ; ERBB2 ; ERBB3 ; ERBB2_3 ; ERBB1_2 ; ERBB1_3        |
| CDK2       | CDK2                      | 0           | 0           | <b>1 Stable state</b><br>MEK1 ; CDK4 ; CyclinD1 ; CyclinE1 ; <b>pRB1</b> ; ERalpha ; AKT1 ; CDK6 ; MYC ; EGF ; ERBB1 ; ERBB2 ; ERBB3 ; ERBB2_3 ; ERBB1_2 ; ERBB1_3        |
| CDK4       | CDK4                      | 0           | 0           | <b>1 Stable state</b><br>MEK1 ; CyclinD1 ; CDK2 ; CyclinE1 ; ERalpha ; AKT1 ; CDK6 ; MYC ; EGF ; ERBB1 ; ERBB2 ; ERBB3 ; ERBB2_3 ; ERBB1_2 ; ERBB1_3                      |
| p21        | p21                       | 0           | 0           | <b>1 Stable state</b><br>MEK1 ; CDK4 ; CyclinD1 ; CDK2 ; CyclinE1 ; <b>pRB1</b> ; ERalpha ; AKT1 ; CDK6 ; MYC ; EGF ; ERBB1 ; ERBB2 ; ERBB3 ; ERBB2_3 ; ERBB1_2 ; ERBB1_3 |
| p27        | p27                       | 0           | 0           | <b>1 Stable state</b><br>MEK1 ; CDK4 ; CyclinD1 ; CDK2 ; CyclinE1 ; <b>pRB1</b> ; ERalpha ; AKT1 ; CDK6 ; MYC ; EGF ; ERBB1 ; ERBB2 ; ERBB3 ; ERBB2_3 ; ERBB1_2 ; ERBB1_3 |
| CycD1      | CyclinD1                  | 0           | 0           | <b>1 Stable state</b><br>MEK1 ; CDK2 ; CyclinE1 ; ERalpha ; AKT1 ; MYC ; EGF ; ERBB1 ; ERBB2 ; ERBB3 ; ERBB2_3 ; ERBB1_2 ; ERBB1_3                                        |
| ERBB2_3    | ERBB2<br>ERBB3            | 0<br>0      | 0<br>0      | <b>1 Stable state</b><br>MEK1 ; CDK4 ; CyclinD1 ; CDK2 ; CyclinE1 ; <b>pRB1</b> ; ERalpha ; AKT1 ; CDK6 ; MYC ; IGF1R ; EGF ; ERBB1                                       |
| ERBB1_3    | ERBB1_3<br>ERBB1<br>ERBB3 | 0<br>0<br>0 | 0<br>0<br>0 | <b>2 Stable states</b><br>p21 ; p27 ; EGF ; ERBB2                                                                                                                         |

|           |          |   |   |                                                                                                                                                                           |
|-----------|----------|---|---|---------------------------------------------------------------------------------------------------------------------------------------------------------------------------|
|           |          |   |   | MEK1 ; CDK4 ; CyclinD1 ; CDK2 ; CyclinE1 ; <b>pRB1</b> ; ERalpha ; AKT1 ; CDK6 ; MYC ; IGF1R ; EGF ; ERBB2                                                                |
| ERBB1     | ERBB1    | 0 | 0 | <b>1 Stable state</b><br>MEK1 ; CDK4 ; CyclinD1 ; CDK2 ; CyclinE1 ; <b>pRB1</b> ; ERalpha ; AKT1 ; CDK6 ; MYC ; EGF ; ERBB2 ; ERBB3 ; ERBB2_3                             |
| ERBB1_2   | ERBB1_2  | 0 | 0 | <b>2 Stable states</b><br>ERBB1 0 0<br>ERBB2 0 0                                                                                                                          |
|           |          |   |   | p21 ; p27 ; EGF ; ERBB3<br>MEK1 ; CDK4 ; CyclinD1 ; CDK2 ; CyclinE1 ; <b>pRB1</b> ; ERalpha ; AKT1 ; CDK6 ; MYC ; IGF1R ; EGF ; ERBB3                                     |
| IGF1R     | IGF1R    | 0 | 0 | <b>1 Stable state</b><br>MEK1 ; CDK4 ; CyclinD1 ; CDK2 ; CyclinE1 ; <b>pRB1</b> ; ERalpha ; AKT1 ; CDK6 ; MYC ; EGF ; ERBB1 ; ERBB2 ; ERBB3 ; ERBB2_3 ; ERBB1_2 ; ERBB1_3 |
| CDK6      | CDK6     | 0 | 0 | <b>1 Stable state</b><br>MEK1 ; CDK4 ; CyclinD1 ; CDK2 ; CyclinE1 ; ERalpha ; AKT1 ; MYC ; EGF ; ERBB1 ; ERBB2 ; ERBB3 ; ERBB2_3 ; ERBB1_2 ; ERBB1_3                      |
| Era       | ERalpha  | 0 | 0 | <b>1 Stable state</b><br>MEK1 ; CDK2 ; CyclinE1 ; AKT1 ; MYC ; EGF ; ERBB1 ; ERBB2 ; ERBB3 ; ERBB2_3 ; ERBB1_2 ; ERBB1_3                                                  |
| MYC       | MYC      | 0 | 0 | <b>1 Stable state</b><br>MEK1 ; ERalpha ; AKT1 ; EGF ; ERBB1 ; ERBB2 ; ERBB3 ; ERBB2_3 ; ERBB1_2 ; ERBB1_3                                                                |
| CyclinE1  | CyclinE1 | 0 | 0 | <b>1 Stable state</b><br>MEK1 ; CDK4 ; CyclinD1 ; <b>pRB1</b> ; ERalpha ; AKT1 ; CDK6 ; MYC ; EGF ; ERBB1 ; ERBB2 ; ERBB3 ; ERBB2_3 ; ERBB1_2 ; ERBB1_3                   |
| ERBB2     | ERBB2    | 0 | 0 | <b>1 Stable state</b><br>MEK1 ; CDK4 ; CyclinD1 ; CDK2 ; CyclinE1 ; <b>pRB1</b> ; ERalpha ; AKT1 ; CDK6 ; MYC ; IGF1R ; EGF ; ERBB1 ; ERBB3 ; ERBB1_3                     |
| ERRB2_MYC | MYC      | 0 | 0 | <b>1 Stable state</b><br>ERBB2 0 0<br>MEK1 ; ERalpha ; AKT1 ; IGF1R ; EGF ; ERBB1 ; ERBB3 ; ERBB1_3                                                                       |
| EGF       | EGF      | 0 | 0 | <b>2 Stable states</b><br>p21 ; p27<br>MEK1 ; CDK4 ; CyclinD1 ; CDK2 ; CyclinE1 ; <b>pRB1</b> ; ERalpha ; AKT1 ; CDK6 ; MYC ; IGF1R                                       |
| AKT1_MEK1 | AKT1     | 0 | 0 | <b>1 Stable state</b><br>MEK1 0 0<br>p21 ; p27 ; EGF ; ERBB1 ; ERBB2 ; ERBB3 ; ERBB2_3 ; ERBB1_2 ; ERBB1_3                                                                |
| AKT1_CDK2 | AKT1     | 0 | 0 | <b>1 Stable state</b><br>CDK2 0 0<br>MEK1 ; CDK4 ; CyclinD1 ; CyclinE1 ; <b>pRB1</b> ; ERalpha ; CDK6 ; MYC ; EGF ; ERBB1 ; ERBB2 ; ERBB3 ; ERBB2_3 ; ERBB1_2 ; ERBB1_3   |
| AKT1_CDK4 | AKT1     | 0 | 0 | <b>1 Stable state</b><br>CDK4 0 0<br>MEK1 ; CyclinD1 ; CDK2 ; CyclinE1 ; ERalpha ; CDK6 ; MYC ; EGF ; ERBB1 ; ERBB2 ; ERBB3 ; ERBB2_3 ; ERBB1_2 ; ERBB1_3                 |
| AKT1_p21  | AKT1     | 0 | 0 | <b>1 Stable state</b>                                                                                                                                                     |

|              |          |   |   |                                                                                                                                           |
|--------------|----------|---|---|-------------------------------------------------------------------------------------------------------------------------------------------|
|              |          |   |   | MEK1 ; CDK4 ; CyclinD1 ; CDK2 ; CyclinE1 ; <b>pRB1</b> ; ERalpha ; CDK6 ; MYC ; EGF ; ERBB1 ; ERBB2 ; ERBB3 ; ERBB2_3 ; ERBB1_2 ; ERBB1_3 |
| AKT1_p27     | AKT1     | 0 | 0 | <b>1 Stable state</b>                                                                                                                     |
|              | p27      | 0 | 0 |                                                                                                                                           |
|              |          |   |   | MEK1 ; CDK4 ; CyclinD1 ; CDK2 ; CyclinE1 ; <b>pRB1</b> ; ERalpha ; CDK6 ; MYC ; EGF ; ERBB1 ; ERBB2 ; ERBB3 ; ERBB2_3 ; ERBB1_2 ; ERBB1_3 |
| AKT1_CycD1   | AKT1     | 0 | 0 | <b>1 Stable state</b>                                                                                                                     |
|              | CyclinD1 | 0 | 0 |                                                                                                                                           |
|              |          |   |   | MEK1 ; CDK2 ; CyclinE1 ; ERalpha ; MYC ; EGF ; ERBB1 ; ERBB2 ; ERBB3 ; ERBB2_3 ; ERBB1_2 ; ERBB1_3                                        |
| AKT1_ERBB2_3 | AKT1     | 0 | 0 | <b>1 Stable state</b>                                                                                                                     |
|              | ERBB2    | 0 | 0 |                                                                                                                                           |
|              | ERBB3    | 0 | 0 |                                                                                                                                           |
|              |          |   |   | MEK1 ; CDK4 ; CyclinD1 ; CDK2 ; CyclinE1 ; <b>pRB1</b> ; ERalpha ; CDK6 ; MYC ; IGF1R ; EGF ; ERBB1                                       |
| AKT1_ERBB1_3 | AKT1     | 0 | 0 | <b>2 Stable states</b>                                                                                                                    |
|              | ERBB1_3  | 0 | 0 |                                                                                                                                           |
|              | ERBB1    | 0 | 0 |                                                                                                                                           |
|              | ERBB3    | 0 | 0 |                                                                                                                                           |
|              |          |   |   | p21 ; p27 ; EGF ; ERBB2                                                                                                                   |
|              |          |   |   | MEK1 ; CDK4 ; CyclinD1 ; CDK2 ; CyclinE1 ; <b>pRB1</b> ; ERalpha ; CDK6 ; MYC ; IGF1R ; EGF ; ERBB2                                       |
| AKT1_ERBB1   | AKT1     | 0 | 0 | <b>1 Stable state</b>                                                                                                                     |
|              | ERBB1    | 0 | 0 |                                                                                                                                           |
|              |          |   |   | MEK1 ; CDK4 ; CyclinD1 ; CDK2 ; CyclinE1 ; <b>pRB1</b> ; ERalpha ; CDK6 ; MYC ; EGF ; ERBB2 ; ERBB3 ; ERBB2_3                             |
| AKT1_ERBB2   | AKT1     | 0 | 0 | <b>1 Stable state</b>                                                                                                                     |
|              | ERBB2    | 0 | 0 |                                                                                                                                           |
|              |          |   |   | MEK1 ; CDK4 ; CyclinD1 ; CDK2 ; CyclinE1 ; <b>pRB1</b> ; ERalpha ; CDK6 ; MYC ; IGF1R ; EGF ; ERBB1 ; ERBB3 ; ERBB1_3                     |
| AKT1_ERBB1_2 | AKT1     | 0 | 0 | <b>2 Stable states</b>                                                                                                                    |
|              | ERBB1_2  | 0 | 0 |                                                                                                                                           |
|              | ERBB1    | 0 | 0 |                                                                                                                                           |
|              | ERBB2    | 0 | 0 |                                                                                                                                           |
|              |          |   |   | p21 ; p27 ; EGF ; ERBB3                                                                                                                   |
|              |          |   |   | MEK1 ; CDK4 ; CyclinD1 ; CDK2 ; CyclinE1 ; <b>pRB1</b> ; ERalpha ; CDK6 ; MYC ; IGF1R ; EGF ; ERBB3                                       |
| AKT1_IGF1R   | AKT1     | 0 | 0 | <b>1 Stable state</b>                                                                                                                     |
|              | IGF1R    | 0 | 0 |                                                                                                                                           |
|              |          |   |   | MEK1 ; CDK4 ; CyclinD1 ; CDK2 ; CyclinE1 ; <b>pRB1</b> ; ERalpha ; CDK6 ; MYC ; EGF ; ERBB1 ; ERBB2 ; ERBB3 ; ERBB2_3 ; ERBB1_2 ; ERBB1_3 |
| AKT1_CDK6    | AKT1     | 0 | 0 | <b>1 Stable state</b>                                                                                                                     |
|              | CDK6     | 0 | 0 |                                                                                                                                           |
|              |          |   |   | MEK1 ; CDK4 ; CyclinD1 ; CDK2 ; CyclinE1 ; ERalpha ; MYC ; EGF ; ERBB1 ; ERBB2 ; ERBB3 ; ERBB2_3 ; ERBB1_2 ; ERBB1_3                      |
| AKT1_ERalpha | AKT1     | 0 | 0 | <b>1 Stable state</b>                                                                                                                     |
|              | ERalpha  | 0 | 0 |                                                                                                                                           |
|              |          |   |   | MEK1 ; CDK2 ; CyclinE1 ; MYC ; EGF ; ERBB1 ; ERBB2 ; ERBB3 ; ERBB2_3 ; ERBB1_2 ; ERBB1_3                                                  |
| AKT1_MYC     | AKT1     | 0 | 0 | <b>1 Stable state</b>                                                                                                                     |

|              |                                                                                                                                           |   |   |                        |
|--------------|-------------------------------------------------------------------------------------------------------------------------------------------|---|---|------------------------|
|              | MYC                                                                                                                                       | 0 | 0 |                        |
|              | MEK1 ; p21 ; p27 ; ERalpha ; EGF ; ERBB1 ; ERBB2 ; ERBB3 ; ERBB2_3 ; ERBB1_2 ; ERBB1_3                                                    |   |   |                        |
| AKT1_CycE1   | AKT1                                                                                                                                      | 0 | 0 | <b>1 Stable state</b>  |
|              | CyclinE1                                                                                                                                  | 0 | 0 |                        |
|              | MEK1 ; CDK4 ; CyclinD1 ; <b>pRB1</b> ; ERalpha ; CDK6 ; MYC ; EGF ; ERBB1 ; ERBB2 ; ERBB3 ; ERBB2_3 ; ERBB1_2 ; ERBB1_3                   |   |   |                        |
| MEK1_CDK2    | MEK1                                                                                                                                      | 0 | 0 | <b>1 Stable state</b>  |
|              | CDK2                                                                                                                                      | 0 | 0 |                        |
|              | CDK4 ; CyclinD1 ; CyclinE1 ; <b>pRB1</b> ; ERalpha ; AKT1 ; CDK6 ; MYC ; EGF ; ERBB1 ; ERBB2 ; ERBB3 ; ERBB2_3 ; ERBB1_2 ; ERBB1_3        |   |   |                        |
| MEK1_CDK4    | MEK1                                                                                                                                      | 0 | 0 | <b>1 Stable state</b>  |
|              | CDK4                                                                                                                                      | 0 | 0 |                        |
|              | CyclinD1 ; CDK2 ; CyclinE1 ; ERalpha ; AKT1 ; CDK6 ; MYC ; EGF ; ERBB1 ; ERBB2 ; ERBB3 ; ERBB2_3 ; ERBB1_2 ; ERBB1_3                      |   |   |                        |
| MEK1_p21     | MEK1                                                                                                                                      | 0 | 0 | <b>1 Stable state</b>  |
|              | p21                                                                                                                                       | 0 | 0 |                        |
|              | CDK4 ; CyclinD1 ; CDK2 ; CyclinE1 ; <b>pRB1</b> ; ERalpha ; AKT1 ; CDK6 ; MYC ; EGF ; ERBB1 ; ERBB2 ; ERBB3 ; ERBB2_3 ; ERBB1_2 ; ERBB1_3 |   |   |                        |
| MEK1_p27     | MEK1                                                                                                                                      | 0 | 0 | <b>1 Stable state</b>  |
|              | p27                                                                                                                                       | 0 | 0 |                        |
|              | CDK4 ; CyclinD1 ; CDK2 ; CyclinE1 ; <b>pRB1</b> ; ERalpha ; AKT1 ; CDK6 ; MYC ; EGF ; ERBB1 ; ERBB2 ; ERBB3 ; ERBB2_3 ; ERBB1_2 ; ERBB1_3 |   |   |                        |
| MEK1_CycD1   | MEK1                                                                                                                                      | 0 | 0 | <b>1 Stable state</b>  |
|              | CyclinD1                                                                                                                                  | 0 | 0 |                        |
|              | CDK2 ; CyclinE1 ; ERalpha ; AKT1 ; MYC ; EGF ; ERBB1 ; ERBB2 ; ERBB3 ; ERBB2_3 ; ERBB1_2 ; ERBB1_3                                        |   |   |                        |
| MEK1_ERBB2_3 | MEK1                                                                                                                                      | 0 | 0 | <b>1 Stable state</b>  |
|              | ERBB2                                                                                                                                     | 0 | 0 |                        |
|              | ERBB3                                                                                                                                     | 0 | 0 |                        |
|              | CDK4 ; CyclinD1 ; CDK2 ; CyclinE1 ; <b>pRB1</b> ; ERalpha ; AKT1 ; CDK6 ; MYC ; IGF1R ; EGF ; ERBB1                                       |   |   |                        |
| MEK1_ERBB1_3 | MEK1                                                                                                                                      | 0 | 0 | <b>2 Stable states</b> |
|              | ERBB1_3                                                                                                                                   | 0 | 0 |                        |
|              | ERBB1                                                                                                                                     | 0 | 0 |                        |
|              | ERBB3                                                                                                                                     | 0 | 0 |                        |
|              | p21 ; p27 ; EGF ; ERBB2<br>CDK4 ; CyclinD1 ; CDK2 ; CyclinE1 ; <b>pRB1</b> ; ERalpha ; AKT1 ; CDK6 ; MYC ; IGF1R ; EGF ; ERBB2            |   |   |                        |
| MEK1_ERBB1   | MEK1                                                                                                                                      | 0 | 0 | <b>1 Stable state</b>  |
|              | ERBB1                                                                                                                                     | 0 | 0 |                        |
|              | CDK4 ; CyclinD1 ; CDK2 ; CyclinE1 ; <b>pRB1</b> ; ERalpha ; AKT1 ; CDK6 ; MYC ; EGF ; ERBB2 ; ERBB3 ; ERBB2_3                             |   |   |                        |
| MEK1_ERBB2   | MEK1                                                                                                                                      | 0 | 0 | <b>1 Stable state</b>  |
|              | ERBB2                                                                                                                                     | 0 | 0 |                        |
|              | CDK4 ; CyclinD1 ; CDK2 ; CyclinE1 ; <b>pRB1</b> ; ERalpha ; AKT1 ; CDK6 ; MYC ; IGF1R ; EGF ; ERBB1 ; ERBB3 ; ERBB1_3                     |   |   |                        |
| MEK1_ERBB1_2 | MEK1                                                                                                                                      | 0 | 0 | <b>2 Stable states</b> |
|              | ERBB1_2                                                                                                                                   | 0 | 0 |                        |
|              | ERBB1                                                                                                                                     | 0 | 0 |                        |

|              |                                                                                                                                    |   |   |                        |
|--------------|------------------------------------------------------------------------------------------------------------------------------------|---|---|------------------------|
|              | ERBB2                                                                                                                              | 0 | 0 |                        |
|              | p21 ; p27 ; EGF ; ERBB3                                                                                                            |   |   |                        |
|              | CDK4 ; CyclinD1 ; CDK2 ; CyclinE1 ; pRB1 ; ERalpha ; AKT1 ; CDK6 ; MYC ; IGF1R ; EGF ; ERBB3                                       |   |   |                        |
| MEK1_IGF1R   | MEK1                                                                                                                               | 0 | 0 | <b>1 Stable state</b>  |
|              | IGF1R                                                                                                                              | 0 | 0 |                        |
|              | CDK4 ; CyclinD1 ; CDK2 ; CyclinE1 ; pRB1 ; ERalpha ; AKT1 ; CDK6 ; MYC ; EGF ; ERBB1 ; ERBB2 ; ERBB3 ; ERBB2_3 ; ERBB1_2 ; ERBB1_3 |   |   |                        |
| MEK1_CDK6    | MEK1                                                                                                                               | 0 | 0 | <b>1 Stable state</b>  |
|              | CDK6                                                                                                                               | 0 | 0 |                        |
|              | CDK4 ; CyclinD1 ; CDK2 ; CyclinE1 ; ERalpha ; AKT1 ; MYC ; EGF ; ERBB1 ; ERBB2 ; ERBB3 ; ERBB2_3 ; ERBB1_2 ; ERBB1_3               |   |   |                        |
| MEK1_ERalpha | MEK1                                                                                                                               | 0 | 0 | <b>1 Stable state</b>  |
|              | ERalpha                                                                                                                            | 0 | 0 |                        |
|              | CDK2 ; CyclinE1 ; AKT1 ; MYC ; EGF ; ERBB1 ; ERBB2 ; ERBB3 ; ERBB2_3 ; ERBB1_2 ; ERBB1_3                                           |   |   |                        |
| MEK1_MYC     | MEK1                                                                                                                               | 0 | 0 | <b>1 Stable state</b>  |
|              | MYC                                                                                                                                | 0 | 0 |                        |
|              | ERalpha ; AKT1 ; EGF ; ERBB1 ; ERBB2 ; ERBB3 ; ERBB2_3 ; ERBB1_2 ; ERBB1_3                                                         |   |   |                        |
| MEK1_CyclE1  | MEK1                                                                                                                               | 0 | 0 | <b>1 Stable state</b>  |
|              | CyclinE1                                                                                                                           | 0 | 0 |                        |
|              | CDK4 ; CyclinD1 ; pRB1 ; ERalpha ; AKT1 ; CDK6 ; MYC ; EGF ; ERBB1 ; ERBB2 ; ERBB3 ; ERBB2_3 ; ERBB1_2 ; ERBB1_3                   |   |   |                        |
| CDK2_CDK4    | CDK2                                                                                                                               | 0 | 0 | <b>1 Stable state</b>  |
|              | CDK4                                                                                                                               | 0 | 0 |                        |
|              | MEK1 ; CyclinD1 ; CyclinE1 ; ERalpha ; AKT1 ; CDK6 ; MYC ; EGF ; ERBB1 ; ERBB2 ; ERBB3 ; ERBB2_3 ; ERBB1_2 ; ERBB1_3               |   |   |                        |
| CDK2_p21     | CDK2                                                                                                                               | 0 | 0 | <b>1 Stable state</b>  |
|              | p21                                                                                                                                | 0 | 0 |                        |
|              | MEK1 ; CDK4 ; CyclinD1 ; CyclinE1 ; pRB1 ; ERalpha ; AKT1 ; CDK6 ; MYC ; EGF ; ERBB1 ; ERBB2 ; ERBB3 ; ERBB2_3 ; ERBB1_2 ; ERBB1_3 |   |   |                        |
| CDK2_p27     | CDK2                                                                                                                               | 0 | 0 | <b>1 Stable state</b>  |
|              | p27                                                                                                                                | 0 | 0 |                        |
|              | MEK1 ; CDK4 ; CyclinD1 ; CyclinE1 ; pRB1 ; ERalpha ; AKT1 ; CDK6 ; MYC ; EGF ; ERBB1 ; ERBB2 ; ERBB3 ; ERBB2_3 ; ERBB1_2 ; ERBB1_3 |   |   |                        |
| CDK2_CycD1   | CDK2                                                                                                                               | 0 | 0 | <b>1 Stable state</b>  |
|              | CyclinD1                                                                                                                           | 0 | 0 |                        |
|              | MEK1 ; CyclinE1 ; ERalpha ; AKT1 ; MYC ; EGF ; ERBB1 ; ERBB2 ; ERBB3 ; ERBB2_3 ; ERBB1_2 ; ERBB1_3                                 |   |   |                        |
| CDK2_ERBB2_3 | CDK2                                                                                                                               | 0 | 0 | <b>1 Stable state</b>  |
|              | ERBB2                                                                                                                              | 0 | 0 |                        |
|              | ERBB3                                                                                                                              | 0 | 0 |                        |
|              | MEK1 ; CDK4 ; CyclinD1 ; CyclinE1 ; pRB1 ; ERalpha ; AKT1 ; CDK6 ; MYC ; IGF1R ; EGF ; ERBB1                                       |   |   |                        |
| CDK2_ERBB1_3 | CDK2                                                                                                                               | 0 | 0 | <b>2 Stable states</b> |
|              | ERBB1_3                                                                                                                            | 0 | 0 |                        |
|              | ERBB1                                                                                                                              | 0 | 0 |                        |
|              | ERBB3                                                                                                                              | 0 | 0 |                        |

|              |          |   |   |                                                                                                                                           |
|--------------|----------|---|---|-------------------------------------------------------------------------------------------------------------------------------------------|
|              |          |   |   | p21 ; p27 ; EGF ; ERBB2<br>MEK1 ; CDK4 ; CyclinD1 ; CyclinE1 ; <b>pRB1</b> ; ERalpha ; AKT1 ; CDK6 ; MYC ; IGF1R ; EGF ; ERBB2            |
| CDK2_ERBB1   | CDK2     | 0 | 0 | <b>1 Stable state</b>                                                                                                                     |
|              | ERBB1    | 0 | 0 |                                                                                                                                           |
|              |          |   |   | MEK1 ; CDK4 ; CyclinD1 ; CyclinE1 ; <b>pRB1</b> ; ERalpha ; AKT1 ; CDK6 ; MYC ; EGF ; ERBB2 ; ERBB3 ; ERBB2_3                             |
| CDK2_ERBB2   | CDK2     | 0 | 0 | <b>1 Stable state</b>                                                                                                                     |
|              | ERBB2    | 0 | 0 |                                                                                                                                           |
|              |          |   |   | MEK1 ; CDK4 ; CyclinD1 ; CyclinE1 ; <b>pRB1</b> ; ERalpha ; AKT1 ; CDK6 ; MYC ; IGF1R ; EGF ; ERBB1 ; ERBB3 ; ERBB1_3                     |
| CDK2_ERBB1_2 | CDK2     | 0 | 0 | <b>2 Stable states</b>                                                                                                                    |
|              | ERBB1    | 0 | 0 |                                                                                                                                           |
|              | ERBB2    | 0 | 0 |                                                                                                                                           |
|              |          |   |   | p21 ; p27 ; EGF ; ERBB3<br>MEK1 ; CDK4 ; CyclinD1 ; CyclinE1 ; <b>pRB1</b> ; ERalpha ; AKT1 ; CDK6 ; MYC ; IGF1R ; EGF ; ERBB3            |
| CDK2_IGF1R   | CDK2     | 0 | 0 | <b>1 Stable state</b>                                                                                                                     |
|              | IGF1R    | 0 | 0 |                                                                                                                                           |
|              |          |   |   | MEK1 ; CDK4 ; CyclinD1 ; CyclinE1 ; <b>pRB1</b> ; ERalpha ; AKT1 ; CDK6 ; MYC ; EGF ; ERBB1 ; ERBB2 ; ERBB3 ; ERBB2_3 ; ERBB1_2 ; ERBB1_3 |
| CDK2_CDK6    | CDK2     | 0 | 0 | <b>1 Stable state</b>                                                                                                                     |
|              | CDK6     | 0 | 0 |                                                                                                                                           |
|              |          |   |   | MEK1 ; CDK4 ; CyclinD1 ; CyclinE1 ; ERalpha ; AKT1 ; MYC ; EGF ; ERBB1 ; ERBB2 ; ERBB3 ; ERBB2_3 ; ERBB1_2 ; ERBB1_3                      |
| CDK2_ERalpha | CDK2     | 0 | 0 | <b>1 Stable state</b>                                                                                                                     |
|              | ERalpha  | 0 | 0 |                                                                                                                                           |
|              |          |   |   | MEK1 ; CyclinE1 ; AKT1 ; MYC ; EGF ; ERBB1 ; ERBB2 ; ERBB3 ; ERBB2_3 ; ERBB1_2 ; ERBB1_3                                                  |
| CDK2_MYC     | CDK2     | 0 | 0 | <b>1 Stable state</b>                                                                                                                     |
|              | MYC      | 0 | 0 |                                                                                                                                           |
|              |          |   |   | MEK1 ; ERalpha ; AKT1 ; EGF ; ERBB1 ; ERBB2 ; ERBB3 ; ERBB2_3 ; ERBB1_2 ; ERBB1_3                                                         |
| CDK2_CycE1   | CDK2     | 0 | 0 | <b>1 Stable state</b>                                                                                                                     |
|              | CyclinE1 | 0 | 0 |                                                                                                                                           |
|              |          |   |   | MEK1 ; CDK4 ; CyclinD1 ; <b>pRB1</b> ; ERalpha ; AKT1 ; CDK6 ; MYC ; EGF ; ERBB1 ; ERBB2 ; ERBB3 ; ERBB2_3 ; ERBB1_2 ; ERBB1_3            |
| CDK4_p21     | CDK4     | 0 | 0 | <b>1 Stable state</b>                                                                                                                     |
|              | p21      | 0 | 0 |                                                                                                                                           |
|              |          |   |   | MEK1 ; CyclinD1 ; CDK2 ; CyclinE1 ; ERalpha ; AKT1 ; CDK6 ; MYC ; EGF ; ERBB1 ; ERBB2 ; ERBB3 ; ERBB2_3 ; ERBB1_2 ; ERBB1_3               |
| CDK4_p27     | CDK4     | 0 | 0 | <b>1 Stable state</b>                                                                                                                     |
|              | p27      | 0 | 0 |                                                                                                                                           |
|              |          |   |   | MEK1 ; CyclinD1 ; CDK2 ; CyclinE1 ; ERalpha ; AKT1 ; CDK6 ; MYC ; EGF ; ERBB1 ; ERBB2 ; ERBB3 ; ERBB2_3 ; ERBB1_2 ; ERBB1_3               |
| CDK4_CycD1   | CDK4     | 0 | 0 | <b>1 Stable state</b>                                                                                                                     |
|              | CyclinD1 | 0 | 0 |                                                                                                                                           |
|              |          |   |   | MEK1 ; CDK2 ; CyclinE1 ; ERalpha ; AKT1 ; MYC ; EGF ; ERBB1 ; ERBB2 ; ERBB3 ; ERBB2_3 ; ERBB1_2 ; ERBB1_3                                 |
| CDK4_ERBB2_3 | CDK4     | 0 | 0 | <b>1 Stable state</b>                                                                                                                     |

|              |                                                                                                                                           |   |   |                        |
|--------------|-------------------------------------------------------------------------------------------------------------------------------------------|---|---|------------------------|
|              | ERBB2                                                                                                                                     | 0 | 0 |                        |
|              | ERBB3                                                                                                                                     | 0 | 0 |                        |
|              | MEK1 ; CyclinD1 ; CDK2 ; CyclinE1 ; ERalpha ; AKT1 ; CDK6 ; MYC ; IGF1R ; EGF ; ERBB1                                                     |   |   |                        |
| CDK4_ERBB1_3 | CDK4                                                                                                                                      | 0 | 0 | <b>2 Stable states</b> |
|              | ERBB1_3                                                                                                                                   | 0 | 0 |                        |
|              | ERBB1                                                                                                                                     | 0 | 0 |                        |
|              | ERBB3                                                                                                                                     | 0 | 0 |                        |
|              | p21 ; p27 ; EGF ; ERBB2                                                                                                                   |   |   |                        |
|              | MEK1 ; CyclinD1 ; CDK2 ; CyclinE1 ; ERalpha ; AKT1 ; CDK6 ; MYC ; IGF1R ; EGF ; ERBB2                                                     |   |   |                        |
| CDK4_ERBB1   | CDK4                                                                                                                                      | 0 | 0 | <b>1 Stable state</b>  |
|              | ERBB1                                                                                                                                     | 0 | 0 |                        |
|              | MEK1 ; CyclinD1 ; CDK2 ; CyclinE1 ; ERalpha ; AKT1 ; CDK6 ; MYC ; EGF ; ERBB2 ; ERBB3 ; ERBB2_3                                           |   |   |                        |
| CDK4_ERBB2   | CDK4                                                                                                                                      | 0 | 0 | <b>1 Stable state</b>  |
|              | ERBB2                                                                                                                                     | 0 | 0 |                        |
|              | MEK1 ; CyclinD1 ; CDK2 ; CyclinE1 ; ERalpha ; AKT1 ; CDK6 ; MYC ; IGF1R ; EGF ; ERBB1 ; ERBB3 ; ERBB1_3                                   |   |   |                        |
| CDK4_ERBB1_2 | CDK4                                                                                                                                      | 0 | 0 | <b>2 Stable states</b> |
|              | ERBB1_2                                                                                                                                   | 0 | 0 |                        |
|              | ERBB1                                                                                                                                     | 0 | 0 |                        |
|              | ERBB2                                                                                                                                     | 0 | 0 |                        |
|              | p21 ; p27 ; EGF ; ERBB3                                                                                                                   |   |   |                        |
|              | MEK1 ; CyclinD1 ; CDK2 ; CyclinE1 ; ERalpha ; AKT1 ; CDK6 ; MYC ; IGF1R ; EGF ; ERBB3                                                     |   |   |                        |
| CDK4_IGF1R   | CDK4                                                                                                                                      | 0 | 0 | <b>1 Stable state</b>  |
|              | IGF1R                                                                                                                                     | 0 | 0 |                        |
|              | MEK1 ; CyclinD1 ; CDK2 ; CyclinE1 ; ERalpha ; AKT1 ; CDK6 ; MYC ; EGF ; ERBB1 ; ERBB2 ; ERBB3 ; ERBB2_3 ; ERBB1_2 ; ERBB1_3               |   |   |                        |
| CDK4_CDK6    | CDK4                                                                                                                                      | 0 | 0 | <b>1 Stable state</b>  |
|              | CDK6                                                                                                                                      | 0 | 0 |                        |
|              | MEK1 ; CyclinD1 ; CDK2 ; CyclinE1 ; ERalpha ; AKT1 ; MYC ; EGF ; ERBB1 ; ERBB2 ; ERBB3 ; ERBB2_3 ; ERBB1_2 ; ERBB1_3                      |   |   |                        |
| CDK4_ERalpha | CDK4                                                                                                                                      | 0 | 0 | <b>1 Stable state</b>  |
|              | ERalpha                                                                                                                                   | 0 | 0 |                        |
|              | MEK1 ; CDK2 ; CyclinE1 ; AKT1 ; MYC ; EGF ; ERBB1 ; ERBB2 ; ERBB3 ; ERBB2_3 ; ERBB1_2 ; ERBB1_3                                           |   |   |                        |
| CDK4_MYC     | CDK4                                                                                                                                      | 0 | 0 | <b>1 Stable state</b>  |
|              | MYC                                                                                                                                       | 0 | 0 |                        |
|              | MEK1 ; ERalpha ; AKT1 ; EGF ; ERBB1 ; ERBB2 ; ERBB3 ; ERBB2_3 ; ERBB1_2 ; ERBB1_3                                                         |   |   |                        |
| CDK4_CycE1   | CDK4                                                                                                                                      | 0 | 0 | <b>1 Stable state</b>  |
|              | CyclinE1                                                                                                                                  | 0 | 0 |                        |
|              | MEK1 ; CyclinD1 ; ERalpha ; AKT1 ; CDK6 ; MYC ; EGF ; ERBB1 ; ERBB2 ; ERBB3 ; ERBB2_3 ; ERBB1_2 ; ERBB1_3                                 |   |   |                        |
| p21_p27      | p21                                                                                                                                       | 0 | 0 | <b>1 Stable state</b>  |
|              | p27                                                                                                                                       | 0 | 0 |                        |
|              | MEK1 ; CDK4 ; CyclinD1 ; CDK2 ; CyclinE1 ; pRB1 ; ERalpha ; AKT1 ; CDK6 ; MYC ; EGF ; ERBB1 ; ERBB2 ; ERBB3 ; ERBB2_3 ; ERBB1_2 ; ERBB1_3 |   |   |                        |
| p21_CycD1    | p21                                                                                                                                       | 0 | 0 | <b>1 Stable state</b>  |

|             |                                                                                                                                                  |                                                                                                           |   |                        |
|-------------|--------------------------------------------------------------------------------------------------------------------------------------------------|-----------------------------------------------------------------------------------------------------------|---|------------------------|
|             | CyclinD1                                                                                                                                         | 0                                                                                                         | 0 |                        |
|             |                                                                                                                                                  | MEK1 ; CDK2 ; CyclinE1 ; ERalpha ; AKT1 ; MYC ; EGF ; ERBB1 ; ERBB2 ; ERBB3 ; ERBB2_3 ; ERBB1_2 ; ERBB1_3 |   |                        |
| p21_ERBB2_3 | p21                                                                                                                                              | 0                                                                                                         | 0 | <b>1 Stable state</b>  |
|             | ERBB2                                                                                                                                            | 0                                                                                                         | 0 |                        |
|             | ERBB3                                                                                                                                            | 0                                                                                                         | 0 |                        |
|             | MEK1 ; CDK4 ; CyclinD1 ; CDK2 ; CyclinE1 ; <b>pRB1</b> ; ERalpha ; AKT1 ; CDK6 ; MYC ; IGF1R ; EGF ; ERBB1                                       |                                                                                                           |   |                        |
| p21_ERBB1_3 | p21                                                                                                                                              | 0                                                                                                         | 0 | <b>2 Stable states</b> |
|             | ERBB1_3                                                                                                                                          | 0                                                                                                         | 0 |                        |
|             | ERBB1                                                                                                                                            | 0                                                                                                         | 0 |                        |
|             | ERBB3                                                                                                                                            | 0                                                                                                         | 0 |                        |
|             | p27 ; EGF ; ERBB2<br>MEK1 ; CDK4 ; CyclinD1 ; CDK2 ; CyclinE1 ; <b>pRB1</b> ; ERalpha ; AKT1 ; CDK6 ; MYC ; IGF1R ; EGF ; ERBB2                  |                                                                                                           |   |                        |
| p21_ERBB1   | p21                                                                                                                                              | 0                                                                                                         | 0 | <b>1 Stable state</b>  |
|             | ERBB1                                                                                                                                            | 0                                                                                                         | 0 |                        |
|             | MEK1 ; CDK4 ; CyclinD1 ; CDK2 ; CyclinE1 ; <b>pRB1</b> ; ERalpha ; AKT1 ; CDK6 ; MYC ; EGF ; ERBB2 ; ERBB3 ; ERBB2_3                             |                                                                                                           |   |                        |
| p21_ERBB2   | p21                                                                                                                                              | 0                                                                                                         | 0 | <b>1 Stable state</b>  |
|             | ERBB2                                                                                                                                            | 0                                                                                                         | 0 |                        |
|             | MEK1 ; CDK4 ; CyclinD1 ; CDK2 ; CyclinE1 ; <b>pRB1</b> ; ERalpha ; AKT1 ; CDK6 ; MYC ; IGF1R ; EGF ; ERBB1 ; ERBB3 ; ERBB1_3                     |                                                                                                           |   |                        |
| p21_ERBB1_2 | p21                                                                                                                                              | 0                                                                                                         | 0 | <b>2 Stable states</b> |
|             | ERBB2                                                                                                                                            | 0                                                                                                         | 0 |                        |
|             | ERBB1_2                                                                                                                                          | 0                                                                                                         | 0 |                        |
|             | ERBB1                                                                                                                                            | 0                                                                                                         | 0 |                        |
|             | p27 ; EGF ; ERBB3<br>MEK1 ; CDK4 ; CyclinD1 ; CDK2 ; CyclinE1 ; <b>pRB1</b> ; ERalpha ; AKT1 ; CDK6 ; MYC ; IGF1R ; EGF ; ERBB3                  |                                                                                                           |   |                        |
| p21_IGF1R   | p21                                                                                                                                              | 0                                                                                                         | 0 | <b>1 Stable state</b>  |
|             | IGF1R                                                                                                                                            | 0                                                                                                         | 0 |                        |
|             | MEK1 ; CDK4 ; CyclinD1 ; CDK2 ; CyclinE1 ; <b>pRB1</b> ; ERalpha ; AKT1 ; CDK6 ; MYC ; EGF ; ERBB1 ; ERBB2 ; ERBB3 ; ERBB2_3 ; ERBB1_2 ; ERBB1_3 |                                                                                                           |   |                        |
| p21_CDK6    | p21                                                                                                                                              | 0                                                                                                         | 0 | <b>1 Stable state</b>  |
|             | CDK6                                                                                                                                             | 0                                                                                                         | 0 |                        |
|             | MEK1 ; CDK4 ; CyclinD1 ; CDK2 ; CyclinE1 ; ERalpha ; AKT1 ; MYC ; EGF ; ERBB1 ; ERBB2 ; ERBB3 ; ERBB2_3 ; ERBB1_2 ; ERBB1_3                      |                                                                                                           |   |                        |
| p21_ERalpha | p21                                                                                                                                              | 0                                                                                                         | 0 | <b>1 Stable state</b>  |
|             | ERalpha                                                                                                                                          | 0                                                                                                         | 0 |                        |
|             | MEK1 ; CDK2 ; CyclinE1 ; AKT1 ; MYC ; EGF ; ERBB1 ; ERBB2 ; ERBB3 ; ERBB2_3 ; ERBB1_2 ; ERBB1_3                                                  |                                                                                                           |   |                        |
| p21_MYC     | p21                                                                                                                                              | 0                                                                                                         | 0 | <b>1 Stable state</b>  |
|             | MYC                                                                                                                                              | 0                                                                                                         | 0 |                        |
|             | MEK1 ; ERalpha ; AKT1 ; EGF ; ERBB1 ; ERBB2 ; ERBB3 ; ERBB2_3 ; ERBB1_2 ; ERBB1_3                                                                |                                                                                                           |   |                        |
| p21_CycE1   | p21                                                                                                                                              | 0                                                                                                         | 0 | <b>1 Stable state</b>  |
|             | CyclinE1                                                                                                                                         | 0                                                                                                         | 0 |                        |
|             | MEK1 ; CDK4 ; CyclinD1 ; <b>pRB1</b> ; ERalpha ; AKT1 ; CDK6 ; MYC ; EGF ; ERBB1 ; ERBB2 ; ERBB3 ; ERBB2_3 ; ERBB1_2 ; ERBB1_3                   |                                                                                                           |   |                        |
| p27_CycD1   | p27                                                                                                                                              | 0                                                                                                         | 0 | <b>1 Stable state</b>  |



|               |                                                                                                                                                  |                                                                                                           |   |                        |
|---------------|--------------------------------------------------------------------------------------------------------------------------------------------------|-----------------------------------------------------------------------------------------------------------|---|------------------------|
|               | CyclinD1                                                                                                                                         | 0                                                                                                         | 0 |                        |
|               |                                                                                                                                                  | MEK1 ; CDK2 ; CyclinE1 ; ERalpha ; AKT1 ; MYC ; EGF ; ERBB1 ; ERBB2 ; ERBB3 ; ERBB2_3 ; ERBB1_2 ; ERBB1_3 |   |                        |
| p27_ERBB2_3   | p27                                                                                                                                              | 0                                                                                                         | 0 | <b>1 Stable state</b>  |
|               | ERBB2                                                                                                                                            | 0                                                                                                         | 0 |                        |
|               | ERBB3                                                                                                                                            | 0                                                                                                         | 0 |                        |
|               | MEK1 ; CDK4 ; CyclinD1 ; CDK2 ; CyclinE1 ; <b>pRB1</b> ; ERalpha ; AKT1 ; CDK6 ; MYC ; IGF1R ; EGF ; ERBB1                                       |                                                                                                           |   |                        |
| p27_ERBB1_3   | p27                                                                                                                                              | 0                                                                                                         | 0 | <b>2 Stable states</b> |
|               | ERBB1_3                                                                                                                                          | 0                                                                                                         | 0 |                        |
|               | ERBB1                                                                                                                                            | 0                                                                                                         | 0 |                        |
|               | ERBB3                                                                                                                                            | 0                                                                                                         | 0 |                        |
|               | p21 ; EGF ; ERBB2<br>MEK1 ; CDK4 ; CyclinD1 ; CDK2 ; CyclinE1 ; <b>pRB1</b> ; ERalpha ; AKT1 ; CDK6 ; MYC ; IGF1R ; EGF ; ERBB2                  |                                                                                                           |   |                        |
| p27_ERBB1     | p27                                                                                                                                              | 0                                                                                                         | 0 | <b>1 Stable state</b>  |
|               | ERBB1                                                                                                                                            | 0                                                                                                         | 0 |                        |
|               | MEK1 ; CDK4 ; CyclinD1 ; CDK2 ; CyclinE1 ; <b>pRB1</b> ; ERalpha ; AKT1 ; CDK6 ; MYC ; EGF ; ERBB2 ; ERBB3 ; ERBB2_3                             |                                                                                                           |   |                        |
| p27_ERBB2     | p27                                                                                                                                              | 0                                                                                                         | 0 | <b>1 Stable state</b>  |
|               | ERBB2                                                                                                                                            | 0                                                                                                         | 0 |                        |
|               | MEK1 ; CDK4 ; CyclinD1 ; CDK2 ; CyclinE1 ; <b>pRB1</b> ; ERalpha ; AKT1 ; CDK6 ; MYC ; IGF1R ; EGF ; ERBB1 ; ERBB3 ; ERBB1_3                     |                                                                                                           |   |                        |
| p27_ERBB1_2   | p27                                                                                                                                              | 0                                                                                                         | 0 | <b>2 Stable states</b> |
|               | ERBB2                                                                                                                                            | 0                                                                                                         | 0 |                        |
|               | ERBB1_2                                                                                                                                          | 0                                                                                                         | 0 |                        |
|               | ERBB1                                                                                                                                            | 0                                                                                                         | 0 |                        |
|               | p21 ; EGF ; ERBB3<br>MEK1 ; CDK4 ; CyclinD1 ; CDK2 ; CyclinE1 ; <b>pRB1</b> ; ERalpha ; AKT1 ; CDK6 ; MYC ; IGF1R ; EGF ; ERBB3                  |                                                                                                           |   |                        |
| p27_IGF1R     | p27                                                                                                                                              | 0                                                                                                         | 0 | <b>1 Stable state</b>  |
|               | IGF1R                                                                                                                                            | 0                                                                                                         | 0 |                        |
|               | MEK1 ; CDK4 ; CyclinD1 ; CDK2 ; CyclinE1 ; <b>pRB1</b> ; ERalpha ; AKT1 ; CDK6 ; MYC ; EGF ; ERBB1 ; ERBB2 ; ERBB3 ; ERBB2_3 ; ERBB1_2 ; ERBB1_3 |                                                                                                           |   |                        |
| p27_CDK6      | p27                                                                                                                                              | 0                                                                                                         | 0 | <b>1 Stable state</b>  |
|               | CDK6                                                                                                                                             | 0                                                                                                         | 0 |                        |
|               | MEK1 ; CDK4 ; CyclinD1 ; CDK2 ; CyclinE1 ; ERalpha ; AKT1 ; MYC ; EGF ; ERBB1 ; ERBB2 ; ERBB3 ; ERBB2_3 ; ERBB1_2 ; ERBB1_3                      |                                                                                                           |   |                        |
| p27_ERalpha   | p27                                                                                                                                              | 0                                                                                                         | 0 | <b>1 Stable state</b>  |
|               | ERalpha                                                                                                                                          | 0                                                                                                         | 0 |                        |
|               | MEK1 ; CDK2 ; CyclinE1 ; AKT1 ; MYC ; EGF ; ERBB1 ; ERBB2 ; ERBB3 ; ERBB2_3 ; ERBB1_2 ; ERBB1_3                                                  |                                                                                                           |   |                        |
| p27_MYC       | p27                                                                                                                                              | 0                                                                                                         | 0 | <b>1 Stable state</b>  |
|               | MYC                                                                                                                                              | 0                                                                                                         | 0 |                        |
|               | MEK1 ; ERalpha ; AKT1 ; EGF ; ERBB1 ; ERBB2 ; ERBB3 ; ERBB2_3 ; ERBB1_2 ; ERBB1_3                                                                |                                                                                                           |   |                        |
| p27_CycE1     | p27                                                                                                                                              | 0                                                                                                         | 0 | <b>1 Stable state</b>  |
|               | CyclinE1                                                                                                                                         | 0                                                                                                         | 0 |                        |
|               | MEK1 ; CDK4 ; CyclinD1 ; <b>pRB1</b> ; ERalpha ; AKT1 ; CDK6 ; MYC ; EGF ; ERBB1 ; ERBB2 ; ERBB3 ; ERBB2_3 ; ERBB1_2 ; ERBB1_3                   |                                                                                                           |   |                        |
| CycD1_ERBB2_3 | CyclinD1                                                                                                                                         | 0                                                                                                         | 0 | <b>1 Stable state</b>  |

|               |                                                                                                           |   |   |                        |
|---------------|-----------------------------------------------------------------------------------------------------------|---|---|------------------------|
|               | ERBB2                                                                                                     | 0 | 0 |                        |
|               | ERBB3                                                                                                     | 0 | 0 |                        |
|               | MEK1 ; CDK2 ; CyclinE1 ; ERalpha ; AKT1 ; MYC ; IGF1R ; EGF ; ERBB1                                       |   |   |                        |
| CycD1_ERBB1_3 | CyclinD1                                                                                                  | 0 | 0 | <b>2 Stable states</b> |
|               | ERBB1_3                                                                                                   | 0 | 0 |                        |
|               | ERBB1                                                                                                     | 0 | 0 |                        |
|               | ERBB3                                                                                                     | 0 | 0 |                        |
|               | p21 ; p27 ; EGF ; ERBB2                                                                                   |   |   |                        |
|               | MEK1 ; CDK2 ; CyclinE1 ; ERalpha ; AKT1 ; MYC ; IGF1R ; EGF ; ERBB2                                       |   |   |                        |
| CycD1_ERBB1   | CyclinD1                                                                                                  | 0 | 0 | <b>1 Stable state</b>  |
|               | ERBB1                                                                                                     | 0 | 0 |                        |
|               | MEK1 ; CDK2 ; CyclinE1 ; ERalpha ; AKT1 ; MYC ; EGF ; ERBB2 ; ERBB3 ; ERBB2_3                             |   |   |                        |
| CycD1_ERBB2   | CyclinD1                                                                                                  | 0 | 0 | <b>1 Stable state</b>  |
|               | ERBB2                                                                                                     | 0 | 0 |                        |
|               | MEK1 ; CDK2 ; CyclinE1 ; ERalpha ; AKT1 ; MYC ; IGF1R ; EGF ; ERBB1 ; ERBB3 ; ERBB1_3                     |   |   |                        |
| CycD1_ERBB1_2 | CyclinD1                                                                                                  | 0 | 0 | <b>2 Stable states</b> |
|               | ERBB2                                                                                                     | 0 | 0 |                        |
|               | ERBB1_2                                                                                                   | 0 | 0 |                        |
|               | ERBB1                                                                                                     | 0 | 0 |                        |
|               | p21 ; p27 ; EGF ; ERBB3                                                                                   |   |   |                        |
|               | MEK1 ; CDK2 ; CyclinE1 ; ERalpha ; AKT1 ; MYC ; IGF1R ; EGF ; ERBB3                                       |   |   |                        |
| CycD1_IGF1R   | CyclinD1                                                                                                  | 0 | 0 | <b>1 Stable state</b>  |
|               | IGF1R                                                                                                     | 0 | 0 |                        |
|               | MEK1 ; CDK2 ; CyclinE1 ; ERalpha ; AKT1 ; MYC ; EGF ; ERBB1 ; ERBB2 ; ERBB3 ; ERBB2_3 ; ERBB1_2 ; ERBB1_3 |   |   |                        |
| CycD1_CDK6    | CyclinD1                                                                                                  | 0 | 0 | <b>1 Stable state</b>  |
|               | CDK6                                                                                                      | 0 | 0 |                        |
|               | MEK1 ; CDK2 ; CyclinE1 ; ERalpha ; AKT1 ; MYC ; EGF ; ERBB1 ; ERBB2 ; ERBB3 ; ERBB2_3 ; ERBB1_2 ; ERBB1_3 |   |   |                        |
| CycD1_ERalpha | CyclinD1                                                                                                  | 0 | 0 | <b>1 Stable state</b>  |
|               | ERalpha                                                                                                   | 0 | 0 |                        |
|               | MEK1 ; CDK2 ; CyclinE1 ; AKT1 ; MYC ; EGF ; ERBB1 ; ERBB2 ; ERBB3 ; ERBB2_3 ; ERBB1_2 ; ERBB1_3           |   |   |                        |
| CycD1_MYC     | CyclinD1                                                                                                  | 0 | 0 | <b>1 Stable state</b>  |
|               | MYC                                                                                                       | 0 | 0 |                        |
|               | MEK1 ; ERalpha ; AKT1 ; EGF ; ERBB1 ; ERBB2 ; ERBB3 ; ERBB2_3 ; ERBB1_2 ; ERBB1_3                         |   |   |                        |
| CycD1_CycE1   | CyclinD1                                                                                                  | 0 | 0 | <b>1 Stable state</b>  |
|               | CyclinE1                                                                                                  | 0 | 0 |                        |
|               | MEK1 ; ERalpha ; AKT1 ; MYC ; EGF ; ERBB1 ; ERBB2 ; ERBB3 ; ERBB2_3 ; ERBB1_2 ; ERBB1_3                   |   |   |                        |
| ERBB1_2_3     | ERBB2                                                                                                     | 0 | 0 | <b>2 Stable states</b> |
|               | ERBB3                                                                                                     | 0 | 0 |                        |
|               | ERBB1_2                                                                                                   | 0 | 0 |                        |
|               | ERBB1_3                                                                                                   | 0 | 0 |                        |
|               | ERBB1                                                                                                     | 0 | 0 |                        |
|               | p21 ; p27 ; EGF                                                                                           |   |   |                        |
|               | MEK1 ; CDK4 ; CyclinD1 ; CDK2 ; CyclinE1 ; pRB1 ; ERalpha ; AKT1 ; CDK6 ; MYC ; IGF1R ; EGF               |   |   |                        |

|                 |                                                                                                                  |   |   |                        |
|-----------------|------------------------------------------------------------------------------------------------------------------|---|---|------------------------|
| ERBB2_3_IGFR1   | ERBB2                                                                                                            | 0 | 0 | <b>1 Stable state</b>  |
|                 | ERBB3                                                                                                            | 0 | 0 |                        |
|                 | IGF1R                                                                                                            | 0 | 0 |                        |
|                 | MEK1 ; CDK4 ; CyclinD1 ; CDK2 ; CyclinE1 ; <b>pRB1</b> ; ERalpha ; AKT1 ; CDK6 ; MYC ; EGF ; ERBB1               |   |   |                        |
| ERBB2_3_CDK6    | ERBB2                                                                                                            | 0 | 0 | <b>1 Stable state</b>  |
|                 | ERBB3                                                                                                            | 0 | 0 |                        |
|                 | CDK6                                                                                                             | 0 | 0 |                        |
|                 | MEK1 ; CDK4 ; CyclinD1 ; CDK2 ; CyclinE1 ; ERalpha ; AKT1 ; MYC ; IGF1R ; EGF ; ERBB1                            |   |   |                        |
| ERBB2_3_ERalpha | ERBB2                                                                                                            | 0 | 0 | <b>1 Stable state</b>  |
|                 | ERBB3                                                                                                            | 0 | 0 |                        |
|                 | ERalpha                                                                                                          | 0 | 0 |                        |
|                 | MEK1 ; CDK2 ; CyclinE1 ; AKT1 ; MYC ; IGF1R ; EGF ; ERBB1                                                        |   |   |                        |
| ERBB2_3_MYC     | ERBB2                                                                                                            | 0 | 0 | <b>1 Stable state</b>  |
|                 | ERBB3                                                                                                            | 0 | 0 |                        |
|                 | MYC                                                                                                              | 0 | 0 |                        |
|                 | MEK1 ; ERalpha ; AKT1 ; IGF1R ; EGF ; ERBB1                                                                      |   |   |                        |
| ERBB2_3_CycE1   | ERBB2                                                                                                            | 0 | 0 | <b>1 Stable state</b>  |
|                 | ERBB3                                                                                                            | 0 | 0 |                        |
|                 | CyclinE1                                                                                                         | 0 | 0 |                        |
|                 | MEK1 ; CDK4 ; CyclinD1 ; <b>pRB1</b> ; ERalpha ; AKT1 ; CDK6 ; MYC ; IGF1R ; EGF ; ERBB1                         |   |   |                        |
| ERBB1_3_IGF1R   | ERBB1_3                                                                                                          | 0 | 0 | <b>1 Stable state</b>  |
|                 | ERBB1                                                                                                            | 0 | 0 |                        |
|                 | ERBB3                                                                                                            | 0 | 0 |                        |
|                 | IGF1R                                                                                                            | 0 | 0 |                        |
|                 | p21 ; p27 ; EGF ; ERBB2                                                                                          |   |   |                        |
| ERBB1_3_CDK6    | ERBB1_3                                                                                                          | 0 | 0 | <b>2 Stable states</b> |
|                 | ERBB1                                                                                                            | 0 | 0 |                        |
|                 | ERBB3                                                                                                            | 0 | 0 |                        |
|                 | CDK6                                                                                                             | 0 | 0 |                        |
|                 | p21 ; p27 ; EGF ; ERBB2<br>MEK1 ; CDK4 ; CyclinD1 ; CDK2 ; CyclinE1 ; ERalpha ; AKT1 ; MYC ; IGF1R ; EGF ; ERBB2 |   |   |                        |
| ERBB1_3_ERalpha | ERBB1_3                                                                                                          | 0 | 0 | <b>2 Stable states</b> |
|                 | ERBB1                                                                                                            | 0 | 0 |                        |
|                 | ERBB3                                                                                                            | 0 | 0 |                        |
|                 | ERalpha                                                                                                          | 0 | 0 |                        |
|                 | p21 ; p27 ; EGF ; ERBB2<br>MEK1 ; CDK2 ; CyclinE1 ; AKT1 ; MYC ; IGF1R ; EGF ; ERBB2                             |   |   |                        |
| ERBB1_3_MYC     | ERBB1_3                                                                                                          | 0 | 0 | <b>2 Stable states</b> |
|                 | ERBB1                                                                                                            | 0 | 0 |                        |
|                 | ERBB3                                                                                                            | 0 | 0 |                        |
|                 | MYC                                                                                                              | 0 | 0 |                        |
|                 | p21 ; p27 ; EGF ; ERBB2<br>MEK1 ; ERalpha ; AKT1 ; IGF1R ; EGF ; ERBB2                                           |   |   |                        |

|               |                                                                                                                                |   |   |                        |
|---------------|--------------------------------------------------------------------------------------------------------------------------------|---|---|------------------------|
| ERBB1_3_CycE1 | ERBB1_3                                                                                                                        | 0 | 0 | <b>2 Stable states</b> |
|               | ERBB1                                                                                                                          | 0 | 0 |                        |
|               | ERBB3                                                                                                                          | 0 | 0 |                        |
|               | CyclinE1                                                                                                                       | 0 | 0 |                        |
|               | p21 ; p27 ; EGF ; ERBB2<br>MEK1 ; CDK4 ; CyclinD1 ; <b>pRB1</b> ; ERalpha ; AKT1 ; CDK6 ; MYC ; IGF1R ; EGF ; ERBB2            |   |   |                        |
| ERBB1_IGF1R   | ERBB1                                                                                                                          | 0 | 0 | <b>1 Stable state</b>  |
|               | IGF1R                                                                                                                          | 0 | 0 |                        |
|               | MEK1 ; CDK4 ; CyclinD1 ; CDK2 ; CyclinE1 ; <b>pRB1</b> ; ERalpha ; AKT1 ; CDK6 ; MYC ; EGF ; ERBB2 ; ERBB3 ; ERBB2_3           |   |   |                        |
| ERBB1_CDK6    | ERBB1                                                                                                                          | 0 | 0 | <b>1 Stable state</b>  |
|               | CDK6                                                                                                                           | 0 | 0 |                        |
|               | MEK1 ; CDK4 ; CyclinD1 ; CDK2 ; CyclinE1 ; ERalpha ; AKT1 ; MYC ; EGF ; ERBB2 ; ERBB3 ; ERBB2_3                                |   |   |                        |
| ERBB1_ERalpha | ERBB1                                                                                                                          | 0 | 0 | <b>1 Stable state</b>  |
|               | ERalpha                                                                                                                        | 0 | 0 |                        |
|               | MEK1 ; CDK2 ; CyclinE1 ; AKT1 ; MYC ; EGF ; ERBB2 ; ERBB3 ; ERBB2_3                                                            |   |   |                        |
| ERBB1_MYC     | ERBB1                                                                                                                          | 0 | 0 | <b>1 Stable state</b>  |
|               | MYC                                                                                                                            | 0 | 0 |                        |
|               | MEK1 ; ERalpha ; AKT1 ; EGF ; ERBB2 ; ERBB3 ; ERBB2_3                                                                          |   |   |                        |
| ERBB1_CycE1   | ERBB1                                                                                                                          | 0 | 0 | <b>1 Stable state</b>  |
|               | CyclinE1                                                                                                                       | 0 | 0 |                        |
|               | MEK1 ; CDK4 ; CyclinD1 ; <b>pRB1</b> ; ERalpha ; AKT1 ; CDK6 ; MYC ; EGF ; ERBB2 ; ERBB3 ; ERBB2_3                             |   |   |                        |
| IGF1R_CDK6    | IGF1R                                                                                                                          | 0 | 0 | <b>1 Stable state</b>  |
|               | CDK6                                                                                                                           | 0 | 0 |                        |
|               | MEK1 ; CDK4 ; CyclinD1 ; CDK2 ; CyclinE1 ; ERalpha ; AKT1 ; MYC ; EGF ; ERBB1 ; ERBB2 ; ERBB3 ; ERBB2_3 ; ERBB1_2 ; ERBB1_3    |   |   |                        |
|               |                                                                                                                                |   |   |                        |
| IGF1R_ERalpha | IGF1R                                                                                                                          | 0 | 0 | <b>1 Stable state</b>  |
|               | ERalpha                                                                                                                        | 0 | 0 |                        |
|               | MEK1 ; CDK2 ; CyclinE1 ; AKT1 ; MYC ; EGF ; ERBB1 ; ERBB2 ; ERBB3 ; ERBB2_3 ; ERBB1_2 ; ERBB1_3                                |   |   |                        |
| IGF1R_MYC     | IGF1R                                                                                                                          | 0 | 0 | <b>1 Stable state</b>  |
|               | MYC                                                                                                                            | 0 | 0 |                        |
|               | MEK1 ; ERalpha ; AKT1 ; EGF ; ERBB1 ; ERBB2 ; ERBB3 ; ERBB2_3 ; ERBB1_2 ; ERBB1_3                                              |   |   |                        |
| IGF1R_CycE1   | IGF1R                                                                                                                          | 0 | 0 | <b>1 Stable state</b>  |
|               | CyclinE1                                                                                                                       | 0 | 0 |                        |
|               | MEK1 ; CDK4 ; CyclinD1 ; <b>pRB1</b> ; ERalpha ; AKT1 ; CDK6 ; MYC ; EGF ; ERBB1 ; ERBB2 ; ERBB3 ; ERBB2_3 ; ERBB1_2 ; ERBB1_3 |   |   |                        |
|               |                                                                                                                                |   |   |                        |
| CDK6_ERalpha  | CDK6                                                                                                                           | 0 | 0 | <b>1 Stable state</b>  |
|               | ERalpha                                                                                                                        | 0 | 0 |                        |
|               | MEK1 ; CDK2 ; CyclinE1 ; AKT1 ; MYC ; EGF ; ERBB1 ; ERBB2 ; ERBB3 ; ERBB2_3 ; ERBB1_2 ; ERBB1_3                                |   |   |                        |
| CDK6_MYC      | CDK6                                                                                                                           | 0 | 0 | <b>1 Stable state</b>  |
|               | MYC                                                                                                                            | 0 | 0 |                        |
|               | MEK1 ; ERalpha ; AKT1 ; EGF ; ERBB1 ; ERBB2 ; ERBB3 ; ERBB2_3 ; ERBB1_2 ; ERBB1_3                                              |   |   |                        |
| CDK6_CycE1    | CDK6                                                                                                                           | 0 | 0 | <b>1 Stable state</b>  |
|               | CyclinE1                                                                                                                       | 0 | 0 |                        |

|                  |                                                                                                           |   |   |
|------------------|-----------------------------------------------------------------------------------------------------------|---|---|
|                  | MEK1 ; CDK4 ; CyclinD1 ; ERalpha ; AKT1 ; MYC ; EGF ; ERBB1 ; ERBB2 ; ERBB3 ; ERBB2_3 ; ERBB1_2 ; ERBB1_3 |   |   |
| ERalpha_MYC      | ERalpha                                                                                                   | 0 | 0 |
|                  | MYC                                                                                                       | 0 | 0 |
|                  | MEK1 ; AKT1 ; EGF ; ERBB1 ; ERBB2 ; ERBB3 ; ERBB2_3 ; ERBB1_2 ; ERBB1_3                                   |   |   |
| ERalpha_CyclinE1 | ERalpha                                                                                                   | 0 | 0 |
|                  | CyclinE1                                                                                                  | 0 | 0 |
|                  | MEK1 ; AKT1 ; MYC ; EGF ; ERBB1 ; ERBB2 ; ERBB3 ; ERBB2_3 ; ERBB1_2 ; ERBB1_3                             |   |   |
| MYC_CycE1        | CyclinE1                                                                                                  | 0 | 0 |
|                  | ERalpha                                                                                                   | 0 | 0 |
|                  | MEK1 ; AKT1 ; MYC ; EGF ; ERBB1 ; ERBB2 ; ERBB3 ; ERBB2_3 ; ERBB1_2 ; ERBB1_3                             |   |   |

**Table 2** Analysis of the effects of knockdowns on G1/S transition (p-pRB response).

|                                              | ERBB1_2_3 | ERalpha | AKT1   | ERalpha_AKT1 |
|----------------------------------------------|-----------|---------|--------|--------------|
| <b>P-value</b>                               | <0.001    | <0.001  | <0.001 | <0.001       |
| <b>Similarity to MOCK</b>                    | Yes       | No      | Yes    | No           |
| <b>Boolean interpretation (pRB response)</b> | 1         | 0       | 1      | 0            |
